# Supplementary material for: Undiagnosed cardiovascular risk factors in overweight and obese individuals: a low income country experience
Source: PeerJ. 2021 Feb 2;9:e10870. doi: 10.7717/peerj.10870 (PMC7863779; doi:10.7717/peerj.10870)
Supplement: Data S1 [file peerj-09-10870-s001.xlsx]

## Sheet: base_patricio_medicina
id	sex /female: Female; male: Male)	ge group(years)	Calculated patient age	Mean Scr	eGFR	BMI	overweight (Overweight)/obese (Obese)	SBP	DBP	Hypertension category (normotenso: normal BP)	Albuminuria 1	Albuminuria 2	Mean albuminuria	serum glucose	diabetes category (normal glucose: normal glycemia)	urea 1	urea 2	mean urea	uric 1	uric 2	mean uric	cholesterol	triglycerides	urine density	urine RBC	urine ph
1	Male	18 a 25 años	21.5	1.2	85.6204	27.4	Overweight	122	78	Pre Hipertension	28.7	27.9	28.3	95.3	normal glucose	34.2	28.1	31.15	4.5	3.4	3.95	201.3	185.8	1.023	3	5
2	Male	18 a 25 años	21.5	0.9	121.235	28.9	Overweight	126	76	Pre Hipertension	26	28.8	27.4	78.8	normal glucose	36.9	28.5	32.7	3.2	5.8	4.5	225.7	156.1	1.025	2	6
3	Male	18 a 25 años	21.5	1.15	90.1412	26.7	Overweight	120	79	Pre Hipertension	26	27.9	26.95	82.3	normal glucose	25.1	26.3	25.7	6.3	3.9	5.1	239.6	159.9	1.029	2	7
4	Male	18 a 25 años	21.5	1.3	77.723	26	Overweight	127	79	Pre Hipertension	27.9	26.1	27	82.4	normal glucose	34.1	26.4	30.25	6.4	3.5	4.95	233.4	196.2	1.031	0	6
5	Male	18 a 25 años	21.5	0.95	113.564	25.5	Overweight	128	78	Pre Hipertension	25.1	27.3	26.2	98.7	normal glucose	30.7	31.7	31.2	5.2	4.2	4.7	218.2	174.6	1.034	10	5
6	Male	18 a 25 años	21.5	0.8	127.248	26.7	Overweight	130	83	Hipertension grade I	28.9	25	26.95	112.7	pre Diabetes	30.7	33.2	31.95	7	4.8	5.9	203.8	150.1	1.029	0	5
7	Male	18 a 25 años	21.5	1.05	100.621	28.7	Overweight	138	88	Hipertension grade I	26.2	31.3	28.75	109.8	pre Diabetes	32.9	32.5	32.7	4.9	6.3	5.6	237.1	184.6	1.025	3	6
8	Male	18 a 25 años	21.5	0.75	130.669	27.4	Overweight	136	86	Hipertension grade I	28.5	29.3	28.9	103.3	pre Diabetes	29.5	29.2	29.35	5.4	5.5	5.45	215.1	155.3	1.028	2	5
9	Male	18 a 25 años	21.5	0.75	130.669	26.3	Overweight	120	77	Pre Hipertension	28.9	30	29.45	100.3	pre Diabetes	39.4	30.8	35.1	5.2	3.3	4.25	224.2	159.8	1.029	0	7
10	Male	18 a 25 años	21.5	1.1	95.1181	26.8	Overweight	120	75	Normotension	26.4	27.3	26.85	133.3	Diabetes	37.6	29.6	33.6	7	6.1	6.55	234.1	192.4	1.031	3	8
11	Male	18 a 25 años	21.5	1.05	100.621	25.4	Overweight	116	77	Normotension	25.7	27.4	26.55	83	normal glucose	37	39.9	38.45	3.7	4	3.85	202.4	190.4	1.027	1	7
12	Male	18 a 25 años	21.5	0.95	113.564	28.9	Overweight	110	75	Normotension	25.2	26.1	25.65	92.3	normal glucose	35.5	32.7	34.1	4.6	4.6	4.6	232.3	171.5	1.033	1	8
13	Male	18 a 25 años	21.5	0.95	113.564	26	Overweight	112	79	Normotension	28.1	26.5	27.3	91.8	normal glucose	36.7	33.5	35.1	4.4	3.5	3.95	225.6	156	1.035	1	8
14	Male	18 a 25 años	21.5	1.15	90.1412	27.1	Overweight	113	80	Normotension	28.9	29.7	29.3	89.9	normal glucose	27.2	28.7	27.95	6.4	3.8	5.1	212.3	159.2	1.031	0	5
15	Male	18 a 25 años	21.5	1.15	90.1412	29.2	Overweight	140	92	Hipertension grade II	26.1	26.3	26.2	77.6	normal glucose	30.9	28.5	29.7	7	3.3	5.15	239.4	187	1.031	1	6
16	Male	18 a 25 años	21.5	0.8	127.248	28.7	Overweight	144	94	Hipertension grade II	26.9	28.7	27.8	112.8	pre Diabetes	26.4	37.1	31.75	6.2	6.5	6.35	206	182.6	1.028	1	5
17	Male	18 a 25 años	21.5	1.05	100.621	26.3	Overweight	111	78	Normotension	25.3	29.8	27.55	120.5	pre Diabetes	29.5	36.8	33.15	6.3	6.8	6.55	202.1	172.1	1.027	0	5
18	Male	18 a 25 años	21.5	0.9	121.235	25.8	Overweight	113	76	Normotension	26.6	140.3	83.45	121.7	pre Diabetes	31.2	34.5	32.85	5	3.6	4.3	227.5	177.5	1.034	1	5
19	Male	18 a 25 años	21.5	0.95	113.564	30	Overweight	137	82	Hipertension grade I	29	28.9	28.95	113.7	pre Diabetes	30	32.9	31.45	4.3	7	5.65	225.7	170.5	1.035	0	6
20	Male	18 a 25 años	21.5	0.9	121.235	26.3	Overweight	133	84	Hipertension grade I	29.6	27.3	28.45	88	normal glucose	39	30.7	34.85	4.8	7	5.9	228.6	173.2	1.031	1	5
21	Male	18 a 25 años	21.5	0.8	127.248	29.4	Overweight	135	86	Hipertension grade I	26.6	28.3	27.45	97.1	normal glucose	39.5	29.1	34.3	4.7	5.7	5.2	238.9	171.3	1.028	2	5
22	Male	18 a 25 años	21.5	0.9	121.235	26.9	Overweight	137	80	Hipertension grade I	27.2	25.5	26.35	85.9	normal glucose	36.6	33.8	35.2	7.1	3.9	5.5	207	196.3	1.033	3	5
23	Male	18 a 25 años	21.5	1	106.735	26.4	Overweight	147	96	Hipertension grade II	27.6	27.3	27.45	96.5	normal glucose	29.3	29.7	29.5	4.2	4.9	4.55	219.8	161.9	1.023	0	6
24	Male	18 a 25 años	21.5	1.2	85.6204	28.8	Overweight	143	95	Hipertension grade II	27.5	27.9	27.7	96.7	normal glucose	37.2	26.6	31.9	3.5	4.5	4	220.7	160	1.023	3	5
25	Male	18 a 25 años	21.5	0.9	121.235	27.5	Overweight	148	96	Hipertension grade II	28.9	27.8	28.35	134.2	Diabetes	39.1	38.6	38.85	6.8	3.2	5	208.2	196.6	1.026	0	6
26	Female	18 a 25 años	21.5	0.85	97.9101	27	Overweight	117	75	Normotension	28.5	27.2	27.85	85.7	normal glucose	36	28.7	32.35	3	4.2	3.6	223.2	186.4	1.029	2	7
27	Female	18 a 25 años	21.5	0.6	130.256	28.9	Overweight	110	75	Normotension	29.4	26.8	28.1	92.9	normal glucose	29.2	28.8	29	5.3	4.6	4.95	230.8	167.5	1.028	2	8
28	Female	18 a 25 años	21.5	0.65	126.87	27.9	Overweight	111	77	Normotension	29.5	144.8	87.15	80.4	normal glucose	39.6	25.1	32.35	3.1	4.1	3.6	238.3	150.1	1.034	3	8
29	Female	18 a 25 años	21.5	0.7	123.814	27.2	Overweight	116	78	Normotension	26.8	28.5	27.65	84.3	normal glucose	39.8	31	35.4	4.7	3.9	4.3	211.6	152.9	1.024	2	8
30	Female	18 a 25 años	21.5	0.8	105.356	26.5	Overweight	114	77	Normotension	30	27.4	28.7	85.2	normal glucose	36.6	30.1	33.35	2.6	4	3.3	220.2	190.4	1.035	3	7
31	Female	18 a 25 años	21.5	0.7	123.814	29.9	Overweight	121	79	Pre Hipertension	26.6	25.7	26.15	107.9	pre Diabetes	39.1	40	39.55	2.7	2.6	2.65	200.7	196.6	1.024	3	6
32	Female	18 a 25 años	21.5	0.7	123.814	26.4	Overweight	127	75	Pre Hipertension	28.7	29.2	28.95	114.7	pre Diabetes	34.5	39.9	37.2	4.3	2.8	3.55	219.6	191.2	1.024	2	6
33	Female	18 a 25 años	21.5	0.7	123.814	28.7	Overweight	127	75	Pre Hipertension	27.8	28.6	28.2	113.9	pre Diabetes	34.2	35.4	34.8	5.4	3.1	4.25	208.3	173.7	1.025	1	5
34	Female	18 a 25 años	21.5	0.7	123.814	25.5	Overweight	127	80	Pre Hipertension	29.8	29.2	29.5	113.2	pre Diabetes	35	31.3	33.15	4.2	3.5	3.85	224.1	156.9	1.034	10	5
35	Female	18 a 25 años	21.5	0.75	113.906	25.3	Overweight	128	80	Pre Hipertension	26.1	26	26.05	84.4	normal glucose	30.6	34.3	32.45	5.4	2.9	4.15	213.9	175.8	1.033	3	7
36	Female	18 a 25 años	21.5	0.85	97.9101	27.3	Overweight	137	81	Hipertension grade I	28.8	27	27.9	83.4	normal glucose	30	27.1	28.55	3.3	4	3.65	228.7	178.2	1.024	2	8
37	Female	18 a 25 años	21.5	0.8	105.356	29.9	Overweight	136	89	Hipertension grade I	26	25.4	25.7	78.7	normal glucose	28	30.6	29.3	2.6	2.9	2.75	230.6	188.7	1.024	3	7
38	Female	18 a 25 años	21.5	0.9	91.3725	29.8	Overweight	135	82	Hipertension grade I	27.7	25.3	26.5	78.1	normal glucose	31.6	28.9	30.25	3.3	5.5	4.4	207.9	187.7	1.023	2	8
39	Female	18 a 25 años	21.5	0.9	91.3725	27.6	Overweight	133	86	Hipertension grade I	28.3	29.6	28.95	79.6	normal glucose	36.8	29.3	33.05	5.1	2.6	3.85	211.2	175	1.025	2	7
40	Female	18 a 25 años	21.5	0.7	123.814	25.7	Overweight	132	87	Hipertension grade I	27.1	28.4	27.75	118.2	pre Diabetes	27.4	33.1	30.25	4.7	5.3	5	226.9	187.5	1.032	2	5
41	Female	18 a 25 años	21.5	0.65	126.87	29.6	Overweight	143	95	Hipertension grade II	26.4	26.8	26.6	121.2	pre Diabetes	28.1	38.6	33.35	5.4	2.5	3.95	226.4	158.6	1.033	2	6
42	Female	18 a 25 años	21.5	1.1	71.6888	27.1	Overweight	114	76	Normotension	29.7	27.7	28.7	135.5	Diabetes	27.8	36.5	32.15	3.2	3.8	3.5	205.9	185.8	1.026	3	6
43	Female	18 a 25 años	21.5	1.05	75.8363	25.5	Overweight	115	76	Normotension	26.1	25.5	25.8	73.8	normal glucose	33.2	30.5	31.85	2.7	3.7	3.2	206.8	163.1	1.023	0	5
44	Female	18 a 25 años	21.5	0.85	97.9101	25.6	Overweight	130	89	Hipertension grade I	27.4	29.9	28.65	80.5	normal glucose	31.4	36.9	34.15	4.4	5.3	4.85	219.6	187.6	1.034	3	5
45	Female	18 a 25 años	21.5	1.05	75.8363	28	Overweight	130	87	Hipertension grade I	26.4	29.9	28.15	87.7	normal glucose	34.9	31.3	33.1	4.6	3.3	3.95	200.7	178.3	1.034	1	6
46	Female	18 a 25 años	21.5	0.65	126.87	26.9	Overweight	135	84	Hipertension grade I	25.4	28.9	27.15	91.4	normal glucose	28.6	25.6	27.1	3.3	5	4.15	233	151.6	1.025	2	7
47	Female	18 a 25 años	21.5	0.8	105.356	25	Overweight	148	93	Hipertension grade II	26	25.9	25.95	131.8	Diabetes	37.2	36.7	36.95	4.8	4.2	4.5	230.8	161.7	1.027	1	7
48	Female	18 a 25 años	21.5	1	80.4442	29.7	Overweight	143	95	Hipertension grade II	27.5	25.2	26.35	130.1	Diabetes	34.6	39.9	37.25	4.6	4.2	4.4	235.8	171.5	1.028	1	8
49	Female	18 a 25 años	21.5	0.9	91.3725	27.3	Overweight	117	78	Normotension	26.9	26.5	26.7	86.4	normal glucose	31.8	33.8	32.8	5.1	5.4	5.25	225.7	166.6	1.029	3	8
50	Female	18 a 25 años	21.5	0.75	113.906	28.2	Overweight	114	79	Normotension	28.7	27.5	28.1	94.4	normal glucose	36.1	36.5	36.3	4.7	4.4	4.55	205.7	166.8	1.032	10	7
51	Female	18 a 25 años	21.5	0.9	91.3725	29.5	Overweight	118	80	Normotension	28.8	26.8	27.8	85.2	normal glucose	37.6	32.1	34.85	4.1	3.2	3.65	206.7	163	1.033	3	6
52	Female	18 a 25 años	21.5	1.1	71.6888	28.6	Overweight	120	76	Normotension	26.1	28.6	27.35	97.3	normal glucose	33.5	35.6	34.55	5.3	4.7	5	200.8	156.2	1.027	3	5
53	Female	18 a 25 años	21.5	0.9	91.3725	29.6	Overweight	120	79	Normotension	29	27.1	28.05	75.6	normal glucose	39.3	36.2	37.75	4.6	2.5	3.55	228.3	191.3	1.024	2	6
54	Female	18 a 25 años	21.5	0.9	91.3725	29.9	Overweight	148	92	Hipertension grade II	29.9	28.3	29.1	114.9	pre Diabetes	39.5	29.3	34.4	2.7	5.2	3.95	213.6	187.7	1.025	1	5
55	Female	18 a 25 años	21.5	0.9	91.3725	29.5	Overweight	146	96	Hipertension grade II	27.2	26.5	26.85	107.7	pre Diabetes	30.3	35.9	33.1	3.3	5	4.15	228.2	178.5	1.024	0	6
56	Female	18 a 25 años	21.5	0.9	91.3725	29.8	Overweight	148	92	Hipertension grade II	27.1	25.2	26.15	114.5	pre Diabetes	36.9	28.7	32.8	3.8	2.7	3.25	227.4	170	1.029	3	6
57	Female	18 a 25 años	21.5	0.75	113.906	25.3	Overweight	145	96	Hipertension grade II	29.6	28.3	28.95	114.7	pre Diabetes	35	27.7	31.35	4.7	3.5	4.1	205.5	180.7	1.026	3	6
58	Female	18 a 25 años	21.5	0.7	123.814	26.9	Overweight	144	96	Hipertension grade II	25.3	26.2	25.75		#NULL!	28.5	33	30.75	3.4	4.2	3.8	238.3	150.2	1.026	2	5
59	Male	26 a 40 años	33	0.9	111.826	29.6	Overweight	121	76	Pre Hipertension	25.5	25	25.25	70.7	normal glucose	33.6	35.9	34.75	6.1	5.8	5.95	233.9	174.7	1.024	0	6
60	Male	26 a 40 años	33	0.8	117.373	28.6	Overweight	129	76	Pre Hipertension	29.6	26.6	28.1	70.7	normal glucose	37.9	27.6	32.75	6.5	4.3	5.4	224	154.6	1.024	1	6
61	Male	26 a 40 años	33	1.15	83.1457	27.2	Overweight	127	80	Pre Hipertension	27	29.3	28.15	70.8	normal glucose	38.8	29.1	33.95	8.1	8.2	8.15	207.1	179.9	1.024	1	6
62	Male	26 a 40 años	33	0.9	111.826	29.7	Overweight	122	77	Pre Hipertension	29.9	25.9	27.9	98.4	normal glucose	37.6	29.3	33.45	3.7	6.7	5.2	204.4	157.9	1.029	3	5
63	Male	26 a 40 años	33	1.15	83.1457	26.7	Overweight	120	78	Pre Hipertension	28	26.3	27.15	91.4	normal glucose	37.1	33	35.05	7.1	5.2	6.15	200.2	157.9	1.032	2	5
64	Male	26 a 40 años	33	0.95	104.75	28.3	Overweight	132	82	Hipertension grade I	28.2	26.8	27.5	105.2	pre Diabetes	36	35.4	35.7	6.4	6.3	6.35	219.8	195.3	1.027	1	8
65	Male	26 a 40 años	33	0.75	120.528	25.2	Overweight	130	82	Hipertension grade I	29.1	28.6	28.85	103.6	pre Diabetes	36.8	30.7	33.75	6.9	4.5	5.7	218.6	178.8	1.031	2	5
66	Male	26 a 40 años	33	0.9	111.826	29.5	Overweight	131	86	Hipertension grade I	28.6	25.8	27.2	112.1	pre Diabetes	38.2	30.5	34.35	3.5	6	4.75	225.8	177	1.031	3	7
67	Male	26 a 40 años	33	1	98.4518	29.3	Overweight	143	96	Hipertension grade II	26.5	25.8	26.15	106.9	pre Diabetes	32.6	27.2	29.9	5.4	4.2	4.8	217	153.7	1.027	0	8
68	Male	26 a 40 años	33	1.1	87.7364	29.9	Overweight	119	75	Normotension	25.9	26.9	26.4	85.1	normal glucose	28	31.7	29.85	3.3	5.1	4.2	214.1	153.3	1.025	3	8
69	Male	26 a 40 años	33	1.25	75.1726	29.2	Overweight	117	76	Normotension	25.7	214.6	120.15	87.6	normal glucose	37.4	39.7	38.55	5.2	4.4	4.8	212.1	191.9	1.033	3	7
70	Male	26 a 40 años	33	1.1	87.7364	25.3	Overweight	119	75	Normotension	26.8	26.1	26.45	91.3	normal glucose	28.9	32.4	30.65	5.9	5	5.45	201.6	192.5	1.025	1	8
71	Male	26 a 40 años	33	1.45	62.8246	29.7	Overweight	110	79	Normotension	25.6	26.4	26	80	normal glucose	31.6	37.7	34.65	4.1	5.4	4.75	223.6	185.1	1.028	0	6
72	Male	26 a 40 años	33	1.2	78.9757	25.6	Overweight	113	75	Normotension	29.4	29.1	29.25	81.9	normal glucose	34.6	28.4	31.5	7	4.9	5.95	208.8	196.5	1.033	1	6
73	Male	26 a 40 años	33	1.3	71.6912	28.1	Overweight	143	96	Hipertension grade II	26.4	27.3	26.85	110.9	pre Diabetes	32.4	28.8	30.6	6.5	3.9	5.2	220	156	1.028	1	6
74	Male	26 a 40 años	33	1.15	83.1457	28	Overweight	148	96	Hipertension grade II	25.1	27.7	26.4	110.8	pre Diabetes	36.1	30.1	33.1	3.4	6.7	5.05	236.3	194.6	1.026	10	5
75	Male	26 a 40 años	33	1.2	78.9757	25.3	Overweight	142	96	Hipertension grade II	28.1	26.7	27.4	102.3	pre Diabetes	25.3	36.7	31	5.3	3.6	4.45	217.4	179.9	1.027	3	5
76	Male	26 a 40 años	33	0.9	111.826	27.5	Overweight	142	91	Hipertension grade II	28.8	27.2	28	107.7	pre Diabetes	35.2	34.6	34.9	7.5	7.6	7.55	206.7	184.6	1.032	0	6
77	Male	26 a 40 años	33	0.9	111.826	27.5	Overweight	120	75	Pre Hipertension	27.1	28	27.55	104.2	pre Diabetes	32.7	32.6	32.65	4.9	5.1	5	217	167.7	1.035	3	5
78	Male	26 a 40 años	33	1.15	83.1457	26.8	Overweight	123	75	Pre Hipertension	25.9	29.3	27.6	123.1	pre Diabetes	32.9	36.6	34.75	5.5	3.7	4.6	207.4	163.5	1.034	1	5
79	Male	26 a 40 años	33	1.2	78.9757	27.3	Overweight	129	80	Pre Hipertension	26.2	27.6	26.9	109.1	pre Diabetes	33.4	34.2	33.8	6.4	6.4	6.4	201	197.8	1.025	0	5
80	Male	26 a 40 años	33	1.1	87.7364	28.2	Overweight	124	77	Pre Hipertension	28.3	29.9	29.1	117.5	pre Diabetes	39.8	29.6	34.7	4.9	3.6	4.25	215.5	151.7	1.031	0	5
81	Male	26 a 40 años	33	1	98.4518	26.1	Overweight	120	80	Pre Hipertension	29	27	28	127.3	Diabetes	27.4	34.9	31.15	4.2	6.5	5.35	233.7	166.3	1.032	3	5
82	Male	26 a 40 años	33	0.85	114.485	27.6	Overweight	135	85	Hipertension grade I	29.6	29.8	29.7	74.7	normal glucose	26.5	26	26.25	3.5	5.2	4.35	225.7	166.3	1.032	2	5
83	Male	26 a 40 años	33	0.85	114.485	26	Overweight	138	83	Hipertension grade I	27.1	25.7	26.4	86.1	normal glucose	25.8	36.4	31.1	3.4	5.4	4.4	224.3	195.2	1.023	3	8
84	Male	26 a 40 años	33	1	98.4518	27.3	Overweight	136	81	Hipertension grade I	28.1	28.6	28.35	78.3	normal glucose	39.3	30.2	34.75	6.5	7	6.75	205.7	151.5	1.025	1	5
85	Male	26 a 40 años	33	1	98.4518	28.7	Overweight	145	92	Hipertension grade II	26.4	26.8	26.6	79.6	normal glucose	31.6	38.2	34.9	4.5	5.2	4.85	208.6	150.6	1.029	2	6
86	Male	26 a 40 años	33	0.75	120.528	26.6	Overweight	144	92	Hipertension grade II	27.4	28.1	27.75	77.1	normal glucose	27.9	25.2	26.55	5.3	6.5	5.9	236.1	185.4	1.034	2	5
87	Male	26 a 40 años	33	0.95	104.75	26.4	Overweight	142	96	Hipertension grade II	27.2	26.7	26.95	116.2	pre Diabetes	32.1	28	30.05	4.3	6.1	5.2	210.5	165.3	1.027	1	6
88	Male	26 a 40 años	33	0.95	104.75	25.6	Overweight	112	76	Normotension	28.8	26.5	27.65	116.4	pre Diabetes	26.5	26.1	26.3	5.5	4.9	5.2	229.1	178.5	1.028	3	6
89	Male	26 a 40 años	33	0.9	111.826	26.1	Overweight	113	77	Normotension	27	29.1	28.05	115	pre Diabetes	36.5	31	33.75	5.6	3.5	4.55	237.4	162.2	1.029	1	5
90	Male	26 a 40 años	33	1.1	87.7364	27.4	Overweight	120	77	Normotension	27.8	168.5	98.15	108.9	pre Diabetes	27.7	38.2	32.95	6	4.5	5.25	222.5	177.6	1.025	0	6
91	Male	26 a 40 años	33	1.2	78.9757	26.5	Overweight	115	75	Normotension	25.5	29.5	27.5	129.9	Diabetes	28	29.2	28.6	5.1	5.9	5.5	239.9	180.5	1.026	1	6
92	Male	26 a 40 años	33	0.95	104.75	27.6	Overweight	117	75	Normotension	29.3	25.3	27.3	134.8	Diabetes	37.2	28.2	32.7	6	4.2	5.1	204.5	150.5	1.025	2	6
93	Male	26 a 40 años	33	1.05	92.8123	29.7	Overweight	132	80	Hipertension grade I	28.7	27.1	27.9	91.3	normal glucose	37.2	27.4	32.3	5.8	4.5	5.15	220	183.9	1.023	2	6
94	Male	26 a 40 años	33	1.2	78.9757	29.5	Overweight	134	85	Hipertension grade I	28.5	29.1	28.8	77.9	normal glucose	26.7	27.4	27.05	4.9	3.3	4.1	235	169.7	1.035	1	6
95	Male	26 a 40 años	33	0.95	104.75	28.4	Overweight	133	84	Hipertension grade I	29.5	25.4	27.45	80.3	normal glucose	38.9	32.3	35.6	6.8	4	5.4	226.5	173.5	1.029	3	5
96	Male	26 a 40 años	33	0.8	117.373	25.5	Overweight	148	95	Hipertension grade II	27.4	29.4	28.4	78.6	normal glucose	33.8	28.1	30.95	5.5	4.6	5.05	204.6	165	1.025	1	5
97	Male	26 a 40 años	33	0.8	117.373	26.2	Overweight	144	91	Hipertension grade II	25.7	25.3	25.5	96.8	normal glucose	35.3	33.1	34.2	4.1	3.1	3.6	214.7	162.5	1.028	2	5
98	Male	26 a 40 años	33	0.9	111.826	27.4	Overweight	146	95	Hipertension grade II	25.1	25.1	25.1	131.7	Diabetes	26.5	39.5	33	7.9	7.9	7.9	223	194.8	1.031	1	5
99	Male	26 a 40 años	33	1.05	92.8123	26.9	Overweight	144	94	Hipertension grade II	29.4	26.4	27.9	128.9	Diabetes	31.9	32.9	32.4	4.9	4.1	4.5	207.9	177.6	1.034	2	6
100	Male	26 a 40 años	33	0.75	120.528	27.8	Overweight	144	91	Hipertension grade II	26.3	27.3	26.8	128	Diabetes	39.3	35.4	37.35	6	5.3	5.65	232	165.9	1.031	3	6
101	Female	26 a 40 años	33	0.95	78.9484	28	Overweight	113	78	Normotension	27.5	25.3	26.4	90.5	normal glucose	29.7	27.3	28.5	2.9	4.9	3.9	229.1	155	1.028	0	6
102	Female	26 a 40 años	33	0.8	97.1797	25.6	Overweight	114	75	Normotension	28.9	27.3	28.1	83.3	normal glucose	25.5	38	31.75	3	4	3.5	208.1	162.7	1.025	2	8
103	Female	26 a 40 años	33	0.65	117.024	25.2	Overweight	118	80	Normotension	26.1	26.1	26.1	87.9	normal glucose	36.9	36.6	36.75	3.6	3	3.3	239.4	150.2	1.027	2	7
104	Female	26 a 40 años	33	0.8	97.1797	29.3	Overweight	120	75	Normotension	27.1	28.9	28	79.6	normal glucose	27.3	25.8	26.55	5.5	2.6	4.05	207.6	160.2	1.024	2	7
105	Female	26 a 40 años	33	1	74.2013	29.4	Overweight	117	80	Normotension	27.3	28.1	27.7	70.4	normal glucose	34.9	29.3	32.1	4.9	4.3	4.6	215.7	152.1	1.025	1	8
106	Female	26 a 40 años	33	0.7	114.206	25	Overweight	121	79	Pre Hipertension	27.9	29.1	28.5	104.7	pre Diabetes	37	31.6	34.3	3.6	5.4	4.5	219.5	197.4	1.025	1	8
107	Female	26 a 40 años	33	0.8	97.1797	29.8	Overweight	128	76	Pre Hipertension	26.5	28.9	27.7	104.8	pre Diabetes	34.7	29.5	32.1	2.9	2.9	2.9	238.9	159.4	1.029	10	5
108	Female	26 a 40 años	33	0.9	84.2815	26.6	Overweight	122	77	Pre Hipertension	27.9	25.6	26.75	119.3	pre Diabetes	31.3	38.6	34.95	2.9	4.7	3.8	203.3	154	1.027	2	5
109	Female	26 a 40 años	33	0.85	90.3116	27.5	Overweight	122	78	Pre Hipertension	26.2	25.5	25.85	111.9	pre Diabetes	30.9	27.9	29.4	2.7	3.7	3.2	209.8	168.8	1.029	0	6
110	Female	26 a 40 años	33	0.7	114.206	28.7	Overweight	128	77	Pre Hipertension	26.2	28.7	27.45	133.5	Diabetes	36.5	34.5	35.5	2.9	3.2	3.05	214.1	179.5	1.029	3	5
111	Female	26 a 40 años	33	0.75	105.066	27	Overweight	147	96	Hipertension grade II	26.7	27.3	27	126.1	Diabetes	25.5	39	32.25	4.6	3.3	3.95	236.4	183	1.031	3	6
112	Female	26 a 40 años	33	0.8	97.1797	25.4	Overweight	135	80	Hipertension grade I	26.7	26.2	26.45	125.3	Diabetes	27.9	34.9	31.4	6.8	6.8	6.8	209.4	155.4	1.025	2	5
113	Female	26 a 40 años	33	0.85	90.3116	27.5	Overweight	137	89	Hipertension grade I	27.5	29.1	28.3	133.2	Diabetes	34.2	33.4	33.8	3	5.2	4.1	208.5	156.3	1.035	0	6
114	Female	26 a 40 años	33	1	74.2013	27.6	Overweight	130	84	Hipertension grade I	28.3	29.9	29.1	126.1	Diabetes	39	30.5	34.75	5	4.1	4.55	208.8	176.8	1.029	0	5
115	Female	26 a 40 años	33	0.7	114.206	29.8	Overweight	137	85	Hipertension grade I	27.4	26.2	26.8	129.7	Diabetes	37.6	27.8	32.7	3	4.4	3.7	233.8	174.6	1.025	0	6
116	Female	26 a 40 años	33	0.75	105.066	26.7	Overweight	136	87	Hipertension grade I	26.3	27.7	27	93.4	normal glucose	39	32.2	35.6	4.4	3.3	3.85	205.4	180.4	1.025	0	6
117	Female	26 a 40 años	33	0.75	105.066	27.9	Overweight	144	96	Hipertension grade II	27.4	28.8	28.1	76.2	normal glucose	32.8	25.7	29.25	5	3.3	4.15	232.5	182	1.031	1	7
118	Female	26 a 40 años	33	0.85	90.3116	28.1	Overweight	142	91	Hipertension grade II	26.9	28.2	27.55	80.3	normal glucose	31.3	30.1	30.7	3.7	3.6	3.65	228.7	169.5	1.029	2	7
119	Female	26 a 40 años	33	0.85	90.3116	28.9	Overweight	147	93	Hipertension grade II	28.4	26.1	27.25	85.6	normal glucose	27.9	25.3	26.6	3.2	4.3	3.75	237.8	181.5	1.033	2	8
120	Female	26 a 40 años	33	0.7	114.206	26.1	Overweight	148	95	Hipertension grade II	28.8	27	27.9	91.9	normal glucose	25.7	26.3	26	3.3	2.9	3.1	218.3	172.8	1.024	0	7
121	Female	26 a 40 años	33	0.5	127.574	29.9	Overweight	141	90	Hipertension grade II	28	28	28	122.2	pre Diabetes	30.3	31.6	30.95	3.2	4.1	3.65	210.8	168.7	1.033	2	8
122	Female	26 a 40 años	33	0.8	97.1797	26.1	Overweight	117	80	Normotension	28.4	25.1	26.75	111.8	pre Diabetes	30.2	39.9	35.05	4.9	4.4	4.65	233	173.7	1.034	3	6
123	Female	26 a 40 años	33	0.95	78.9484	28.7	Overweight	116	77	Normotension	26.1	25	25.55	107.1	pre Diabetes	33.2	37.7	35.45	4.5	5.2	4.85	222.4	160.1	1.029	2	5
124	Female	26 a 40 años	33	0.9	84.2815	27.2	Overweight	116	76	Normotension	28.7	26.9	27.8	112.7	pre Diabetes	32.2	30.2	31.2	2.6	4.9	3.75	228.1	158	1.027	1	5
125	Female	26 a 40 años	33	0.9	84.2815	25.4	Overweight	114	78	Normotension	27.6	29.1	28.35	133.2	Diabetes	25.8	36.9	31.35	6.5	6.5	6.5	219.3	163	1.024	1	6
126	Female	26 a 40 años	33	0.95	78.9484	29.2	Overweight	119	77	Normotension	26.2	29	27.6	131.1	Diabetes	39.3	34.4	36.85	5.5	4.8	5.15	203.2	179.6	1.031	0	6
127	Female	26 a 40 años	33	1.05	69.9509	28	Overweight	123	76	Pre Hipertension	26.7	25.9	26.3	130.5	Diabetes	35.8	30.5	33.15	4	3	3.5	201	179.4	1.023	2	5
128	Female	26 a 40 años	33	0.95	78.9484	28.1	Overweight	124	75	Pre Hipertension	28	28.8	28.4	127.1	Diabetes	26.7	26.2	26.45	4.3	3.4	3.85	207	161.1	1.032	1	6
129	Female	26 a 40 años	33	1	74.2013	25.3	Overweight	129	78	Pre Hipertension	25.7	25.5	25.6	91	normal glucose	32.7	25.9	29.3	2.9	3.8	3.35	239.9	184.3	1.024	3	5
130	Female	26 a 40 años	33	1.05	69.9509	26.7	Overweight	123	75	Pre Hipertension	25.7	27.1	26.4	86	normal glucose	40	29.3	34.65	4.3	3.1	3.7	210	177.8	1.034	0	6
131	Female	26 a 40 años	33	0.45	132.074	25.8	Overweight	127	75	Pre Hipertension	26.3	25.9	26.1	84.2	normal glucose	37.6	29.5	33.55	3.6	3.2	3.4	218	155.2	1.024	2	5
132	Female	26 a 40 años	33	0.85	90.3116	28.6	Overweight	142	90	Hipertension grade II	27.6	25.7	26.65	96.4	normal glucose	32.9	25.2	29.05	3.1	2.6	2.85	229.5	161.6	1.029	1	6
133	Female	26 a 40 años	33	0.95	78.9484	27.2	Overweight	139	86	Hipertension grade I	29.9	29.3	29.6	98.5	normal glucose	38.8	29	33.9	4.4	4.5	4.45	237	168.9	1.029	0	6
134	Female	26 a 40 años	33	0.75	105.066	25	Overweight	138	89	Hipertension grade I	27.2	25.1	26.15	115.8	pre Diabetes	38.3	35	36.65	4.6	3.1	3.85	212.1	183.2	1.023	2	6
135	Female	26 a 40 años	33	0.6	120.147	27.3	Overweight	130	88	Hipertension grade I	28	29.3	28.65	112.5	pre Diabetes	39.8	32	35.9	5.1	4.8	4.95	208.9	166	1.025	3	5
136	Male	41 a 65 años	53	0.95	91.0208	29.4	Overweight	138	82	Hipertension grade I	27.6	25.2	26.4	94.3	normal glucose	36.7	25.3	31	3.9	6.2	5.05	227.6	173.9	1.029	2	5
137	Male	41 a 65 años	53	1.1	76.2368	25.2	Overweight	131	82	Hipertension grade I	26.2	28	27.1	78.3	normal glucose	26.1	35.3	30.7	5.3	6	5.65	221.5	183.2	1.028	1	6
138	Male	41 a 65 años	53	0.95	91.0208	30	Overweight	131	84	Hipertension grade I	27.7	25.9	26.8	74.7	normal glucose	35.6	26	30.8	4	3.1	3.55	222.1	157.9	1.024	2	7
139	Male	41 a 65 años	53	1	85.5477	29.8	Overweight	114	78	Normotension	25.5	25.1	25.3	95.7	normal glucose	31.8	26.4	29.1	3.5	6.5	5	222.1	186.7	1.035	0	8
140	Male	41 a 65 años	53	0.95	91.0208	28.2	Overweight	117	76	Normotension	26	28.9	27.45	90.7	normal glucose	25.1	25	25.05	3.8	4.3	4.05	202.1	163.2	1.033	0	8
141	Male	41 a 65 años	53	0.8	101.989	29.7	Overweight	114	78	Normotension	26.7	27.7	27.2	134	Diabetes	30.9	36.3	33.6	4.1	6	5.05	230.2	172.2	1.028	3	7
142	Male	41 a 65 años	53	1	85.5477	25.1	Overweight	110	75	Normotension	25.9	28.3	27.1	126.7	Diabetes	32.8	28.5	30.65	3.1	5.9	4.5	214.6	168.9	1.028	0	7
143	Male	41 a 65 años	53	0.95	91.0208	27.1	Overweight	120	76	Normotension	28.8	25	26.9	128.1	Diabetes	33.8	36.6	35.2	4.3	3.2	3.75	211.3	177.7	1.029	0	7
144	Male	41 a 65 años	53	0.95	91.0208	28.5	Overweight	141	94	Hipertension grade II	28.2	25	26.6	91.4	normal glucose	38.1	39.4	38.75	6.8	6.1	6.45	228.3	165.9	1.031	0	6
145	Male	41 a 65 años	53	1.05	80.6474	26	Overweight	141	95	Hipertension grade II	28.9	25.2	27.05	97.1	normal glucose	37	26.6	31.8	6.2	6.4	6.3	210	193.7	1.026	1	6
146	Male	41 a 65 años	53	0.85	99.4791	27.6	Overweight	140	93	Hipertension grade II	27.4	27.9	27.65	88.2	normal glucose	29.8	39.6	34.7	6.1	4.1	5.1	214.7	192.5	1.033	2	5
147	Male	41 a 65 años	53	0.7	107.743	29.9	Overweight	146	90	Hipertension grade II	28.9	183.3	106.1	119.1	pre Diabetes	39.7	38	38.85	4.3	5.7	5	203.7	180.6	1.031	1	6
148	Male	41 a 65 años	53	0.85	99.4791	27.9	Overweight	125	80	Pre Hipertension	25.8	25.8	25.8	114.8	pre Diabetes	25.8	28.6	27.2	5.7	5	5.35	229.8	161.8	1.027	0	5
149	Male	41 a 65 años	53	1	85.5477	27	Overweight	122	78	Pre Hipertension	25.9	28.5	27.2	112.1	pre Diabetes	33.9	31.7	32.8	4.6	4	4.3	201.4	175	1.029	3	6
150	Male	41 a 65 años	53	1.2	68.6244	29.7	Overweight	128	75	Pre Hipertension	27.3	29.9	28.6	103.9	pre Diabetes	38	37.6	37.8	3.7	5.8	4.75	218.3	153.5	1.027	2	5
151	Male	41 a 65 años	53	0.9	97.1693	25.9	Overweight	127	80	Pre Hipertension	25.8	25.4	25.6	131.6	Diabetes	36.3	30.2	33.25	5.8	6.6	6.2	224.6	160.3	1.032	1	5
152	Male	41 a 65 años	53	1	85.5477	29	Overweight	125	77	Pre Hipertension	27.1	25.7	26.4	129.5	Diabetes	31.3	30.1	30.7	4.6	4.1	4.35	231.3	163.4	1.032	1	5
153	Male	41 a 65 años	53	0.85	99.4791	26.8	Overweight	138	80	Hipertension grade I	27.5	26.2	26.85	132.4	Diabetes	29.5	33.4	31.45	4.7	5.1	4.9	207.9	195	1.028	10	5
154	Male	41 a 65 años	53	0.95	91.0208	29.5	Overweight	134	85	Hipertension grade I	26	28	27	83.9	normal glucose	36.4	34.5	35.45	4.2	3.8	4	221.6	169.8	1.025	1	6
155	Male	41 a 65 años	53	0.85	99.4791	26.1	Overweight	136	89	Hipertension grade I	29.5	25.8	27.65	72.8	normal glucose	29.4	31.8	30.6	6.5	7.1	6.8	217.4	156.9	1.029	0	6
156	Male	41 a 65 años	53	0.85	99.4791	25.8	Overweight	147	96	Hipertension grade II	25.7	28.4	27.05	96.8	normal glucose	32.1	35.6	33.85	4.1	4.7	4.4	235.3	173.2	1.034	0	5
157	Male	41 a 65 años	53	0.95	91.0208	27.6	Overweight	142	90	Hipertension grade II	27.9	28.6	28.25	86.5	normal glucose	25.4	26.3	25.85	6.2	4.1	5.15	204.9	158.9	1.025	0	6
158	Male	41 a 65 años	53	0.9	97.1693	25.3	Overweight	144	94	Hipertension grade II	27.4	26.3	26.85	88.3	normal glucose	27.5	31.5	29.5	3.6	3.3	3.45	233	174	1.029	1	6
159	Male	41 a 65 años	53	0.9	97.1693	26.5	Overweight	146	96	Hipertension grade II	29.3	27.1	28.2	108.8	pre Diabetes	35.1	25.7	30.4	6.9	6.7	6.8	236.6	192.5	1.029	2	7
160	Male	41 a 65 años	53	1.2	68.6244	29	Overweight	143	94	Hipertension grade II	25.4	27.1	26.25	107.2	pre Diabetes	27.5	31.3	29.4	3.6	5.2	4.4	239.4	188.9	1.034	2	5
161	Male	41 a 65 años	53	1.15	72.2478	27.2	Overweight	147	90	Hipertension grade II	28.2	25.8	27	106.5	pre Diabetes	31.6	30.4	31	3.7	3.7	3.7	211.8	165.7	1.034	0	6
162	Male	41 a 65 años	53	1.15	72.2478	25.1	Overweight	146	92	Hipertension grade II	25.1	29	27.05	109.1	pre Diabetes	33.8	33.9	33.85	4.4	3.9	4.15	232.4	177.5	1.029	2	6
163	Male	41 a 65 años	53	1.15	72.2478	29	Overweight	113	80	Normotension	27.6	25.3	26.45	109.1	pre Diabetes	38.1	27.2	32.65	6.1	3.9	5	219.8	156	1.029	0	6
164	Male	41 a 65 años	53	1.1	76.2368	29.2	Overweight	117	80	Normotension	26.9	26.8	26.85	122.9	pre Diabetes	31.9	26.7	29.3	6.2	5.8	6	227.2	180.6	1.033	1	6
165	Male	41 a 65 años	53	0.95	91.0208	28.4	Overweight	114	75	Normotension	29.5	26.8	28.15	116.6	pre Diabetes	31	33.7	32.35	6.5	3.4	4.95	200.9	176.8	1.029	3	5
166	Male	41 a 65 años	53	0.95	91.0208	25.1	Overweight	117	78	Normotension	28.6	26.7	27.65	110	pre Diabetes	29.6	35.8	32.7	5.3	5.6	5.45	213.6	174.9	1.026	1	5
167	Male	41 a 65 años	53	0.95	91.0208	27.7	Overweight	115	76	Normotension	27.2	29.1	28.15	127.8	Diabetes	25.2	32.4	28.8	4.3	5.5	4.9	203.5	160.4	1.033	1	5
168	Male	41 a 65 años	53	0.95	91.0208	28.7	Overweight	131	80	Hipertension grade I	26.2	29.4	27.8	125.9	Diabetes	26.3	36	31.15	3.6	6.3	4.95	210	157.8	1.028	2	8
169	Male	41 a 65 años	53	0.95	91.0208	28	Overweight	134	87	Hipertension grade I	28.7	27.7	28.2	133.6	Diabetes	28.8	35.8	32.3	6.3	4.7	5.5	212.6	180.1	1.024	0	7
170	Male	41 a 65 años	53	0.95	91.0208	29.7	Overweight	134	81	Hipertension grade I	25.5	26.6	26.05	128.9	Diabetes	25.1	34	29.55	6.4	3.3	4.85	236.9	165.7	1.025	0	7
171	Male	41 a 65 años	53	0.75	104.73	25.7	Overweight	148	94	Hipertension grade II	29.9	29.5	29.7	125.7	Diabetes	36.7	35.9	36.3	3.3	5.7	4.5	216.7	190.8	1.029	1	7
172	Male	41 a 65 años	53	1.1	76.2368	29.2	Overweight	147	91	Hipertension grade II	28.2	25.5	26.85	75.3	normal glucose	39.3	28.1	33.7	4.6	5.7	5.15	238.9	184.2	1.025	2	8
173	Male	41 a 65 años	53	0.95	91.0208	28	Overweight	145	95	Hipertension grade II	29	29.5	29.25	81.4	normal glucose	32.5	38.1	35.3	4.9	6.3	5.6	238.8	192.3	1.034	0	6
174	Male	41 a 65 años	53	1.2	68.6244	28.5	Overweight	140	93	Hipertension grade II	29.6	28.6	29.1	87.4	normal glucose	35.3	30.2	32.75	7	5.5	6.25	209.1	196.4	1.035	3	5
175	Male	41 a 65 años	53	0.7	107.743	28.1	Overweight	147	96	Hipertension grade II	26.5	29.1	27.8	86.7	normal glucose	37.3	39.7	38.5	4	4.3	4.15	230.4	194.4	1.029	0	6
176	Male	41 a 65 años	53	1	85.5477	27.9	Overweight	128	77	Pre Hipertension	155.9	102.3	129.1	85.2	normal glucose	27.8	32	29.9	4.9	5.3	5.1	208.4	177.9	1.033	3	6
177	Male	41 a 65 años	53	1	85.5477	29.7	Overweight	120	79	Pre Hipertension	27.3	28.4	27.85	113.9	pre Diabetes	29.1	34.4	31.75	6.4	5.4	5.9	200.1	195.9	1.026	1	5
178	Male	41 a 65 años	53	1.1	76.2368	28.5	Overweight	120	77	Pre Hipertension	26.5	27.4	26.95	118.8	pre Diabetes	37.6	27.8	32.7	4.7	6.8	5.75	239	192.4	1.028	3	5
179	Male	41 a 65 años	53	0.7	107.743	28.5	Overweight	127	77	Pre Hipertension	27	26	26.5	112.5	pre Diabetes	33	38.4	35.7	3.6	4.9	4.25	220.8	183	1.029	0	6
180	Male	41 a 65 años	53	0.7	107.743	25.3	Overweight	122	80	Pre Hipertension	26.8	29.3	28.05	122.1	pre Diabetes	27.5	38.8	33.15	6	6.8	6.4	221.2	176.3	1.025	0	5
181	Male	41 a 65 años	53	0.9	97.1693	28.4	Overweight	133	81	Hipertension grade I	29.5	29.2	29.35	135.9	Diabetes	39.4	32.6	36	6.6	3.9	5.25	235.4	181.5	1.028	1	6
182	Male	41 a 65 años	53	0.9	97.1693	27.9	Overweight	134	87	Hipertension grade I	27.3	28.2	27.75	129.1	Diabetes	31.5	34	32.75	4.3	6.2	5.25	211.2	197.5	1.024	0	6
183	Male	41 a 65 años	53	0.7	107.743	25.4	Overweight	133	83	Hipertension grade I	25.5	25.3	25.4	134.9	Diabetes	37	36.2	36.6	3.8	4.6	4.2	216.8	152.2	1.029	2	5
184	Male	41 a 65 años	53	1.2	68.6244	29.4	Overweight	140	94	Hipertension grade II	25.5	28.1	26.8	135.9	Diabetes	36.5	39	37.75	5.2	4.1	4.65	218.6	179.5	1.028	0	6
185	Male	41 a 65 años	53	1	85.5477	27.8	Overweight	145	90	Hipertension grade II	27.7	25.1	26.4	125	Diabetes	27.8	36.4	32.1	3.5	6.5	5	228.4	150.8	1.033	0	6
186	Female	41 a 65 años	53	0.8	84.4424	28.5	Overweight	110	76	Normotension	26.2	28.3	27.25	79.1	normal glucose	31.9	36.4	34.15	4.7	3.1	3.9	216.3	170.3	1.025	1	6
187	Female	41 a 65 años	53	0.8	84.4424	28.2	Overweight	117	75	Normotension	28	28	28	90.5	normal glucose	39.9	33.3	36.6	3.1	2.9	3	239.8	177.1	1.025	0	6
188	Female	41 a 65 años	53	0.65	101.686	29.5	Overweight	118	77	Normotension	28.1	25.2	26.65	91.9	normal glucose	34.1	34.6	34.35	5.4	4.7	5.05	226.1	182.3	1.024	2	8
189	Female	41 a 65 años	53	0.85	78.4745	26.2	Overweight	116	75	Normotension	28.1	29.9	29	93.6	normal glucose	35.6	29.2	32.4	2.8	5.1	3.95	237.5	171.1	1.031	2	8
190	Female	41 a 65 años	53	0.75	91.295	27.8	Overweight	114	78	Normotension	25.3	25.6	25.45	85.1	normal glucose	39.4	38	38.7	5.4	4.4	4.9	224.8	172.1	1.035	10	7
191	Female	41 a 65 años	53	0.7	99.2368	28.6	Overweight	122	75	Pre Hipertension	26.4	29.9	28.15	123.6	pre Diabetes	31.3	27.6	29.45	2.7	3.4	3.05	236.5	160.1	1.024	1	8
192	Female	41 a 65 años	53	0.9	73.2347	25.5	Overweight	123	77	Pre Hipertension	26.4	28.6	27.5	112.9	pre Diabetes	37	36.8	36.9	3	4.7	3.85	216.3	167.7	1.033	0	8
193	Female	41 a 65 años	53	0.55	107.431	29.3	Overweight	134	88	Hipertension grade I	28.2	25.2	26.7	101.8	pre Diabetes	37.4	27.5	32.45	4.6	3.7	4.15	218.9	191.9	1.025	3	6
194	Female	41 a 65 años	53	0.7	99.2368	25.9	Overweight	124	77	Pre Hipertension	25.1	25.5	25.3	112.5	pre Diabetes	31.1	30.7	30.9	3.6	3.5	3.55	233.1	163	1.025	3	5
195	Female	41 a 65 años	53	0.8	84.4424	29.8	Overweight	124	79	Pre Hipertension	26.8	25.5	26.15	92.4	normal glucose	25.2	36	30.6	4	2.9	3.45	220.5	154.1	1.026	0	5
196	Female	41 a 65 años	53	0.7	99.2368	27.3	Overweight	124	75	Pre Hipertension	29.2	27.1	28.15	86.7	normal glucose	38.1	32.4	35.25	5.5	3.8	4.65	214.1	178	1.029	1	6
197	Female	41 a 65 años	53	0.85	78.4745	25.8	Overweight	128	77	Pre Hipertension	25.1	26.4	25.75	83.8	normal glucose	34.2	28.1	31.15	7.1	7.1	7.1	229.9	179.7	1.025	0	5
198	Female	41 a 65 años	53	0.65	101.686	29.4	Overweight	123	76	Pre Hipertension	28.7	28.2	28.45	95.1	normal glucose	39.4	28.4	33.9	4.1	2.8	3.45	203	174.3	1.029	0	5
199	Female	41 a 65 años	53	0.9	73.2347	29.3	Overweight	132	88	Hipertension grade I	25.4	27.5	26.45	71.4	normal glucose	32.9	39.7	36.3	4.3	5.4	4.85	224.6	159	1.034	0	6
200	Female	41 a 65 años	53	0.8	84.4424	28	Overweight	132	80	Hipertension grade I	28.9	29.3	29.1	105.6	pre Diabetes	35.4	35.3	35.35	3.5	4.3	3.9	212.3	195.3	1.026	3	8
201	Female	41 a 65 años	53	0.95	68.6007	26.6	Overweight	136	87	Hipertension grade I	26.3	28.8	27.55	107.8	pre Diabetes	29.9	35.9	32.9	4.8	4.5	4.65	233.1	195.1	1.029	0	7
202	Female	41 a 65 años	53	0.8	84.4424	25.4	Overweight	139	80	Hipertension grade I	28.9	28.8	28.85	110	pre Diabetes	31.8	39.8	35.8	3.8	5	4.4	228.6	165.9	1.027	3	7
203	Female	41 a 65 años	53	1	64.4757	28.1	Overweight	131	86	Hipertension grade I	26.3	26.5	26.4	111.8	pre Diabetes	29.3	37	33.15	2.6	5.1	3.85	227.9	186	1.029	2	7
204	Female	41 a 65 años	53	0.7	99.2368	25.9	Overweight	132	88	Hipertension grade I	29.5	194.8	112.15	125	Diabetes	35.2	36	35.6	4.1	4.2	4.15	209.4	180.1	1.033	1	8
205	Female	41 a 65 años	53	0.7	99.2368	26.1	Overweight	147	94	Hipertension grade II	27.8	28	27.9	130.1	Diabetes	37.4	29.8	33.6	3.3	2.8	3.05	239.9	158.6	1.029	2	5
206	Female	41 a 65 años	53	0.9	73.2347	27.8	Overweight	144	93	Hipertension grade II	28.7	25.7	27.2	131.9	Diabetes	28.8	27.5	28.15	3.8	3.1	3.45	236.2	159.6	1.026	3	5
207	Female	41 a 65 años	53	0.7	99.2368	25.6	Overweight	148	95	Hipertension grade II	29.7	25.3	27.5	129.6	Diabetes	30.3	35.4	32.85	3.4	4.6	4	226.7	169.5	1.028	3	6
208	Female	41 a 65 años	53	1	64.4757	28.4	Overweight	141	91	Hipertension grade II	29.6	28.4	29	79.4	normal glucose	37.3	38	37.65	3.9	3.1	3.5	209.8	183	1.031	1	6
209	Female	41 a 65 años	53	0.95	68.6007	29.6	Overweight	141	91	Hipertension grade II	26.1	25.8	25.95	89.7	normal glucose	30	30	30	2.7	3.6	3.15	236.8	180.4	1.024	3	8
210	Female	41 a 65 años	53	1	64.4757	28.6	Overweight	143	93	Hipertension grade II	28.6	26.7	27.65	96.3	normal glucose	37.8	38.1	37.95	2.8	2.9	2.85	208.1	172.6	1.033	3	7
211	Female	41 a 65 años	53	0.8	84.4424	29	Overweight	147	96	Hipertension grade II	28.9	27.9	28.4	72.5	normal glucose	34.7	33	33.85	3.8	4.6	4.2	206.3	160.6	1.025	2	8
212	Female	41 a 65 años	53	0.9	73.2347	29.6	Overweight	117	79	Normotension	25.5	26.4	25.95	97.6	normal glucose	29.3	31.3	30.3	3.2	3	3.1	235.7	152.1	1.025	0	7
213	Female	41 a 65 años	53	0.9	73.2347	28.9	Overweight	116	79	Normotension	25.9	28.8	27.35	107.8	pre Diabetes	29	36.7	32.85	2.7	4.3	3.5	225.4	150.1	1.028	3	7
214	Female	41 a 65 años	53	0.8	84.4424	25.6	Overweight	117	77	Normotension	28.1	29	28.55	122.5	pre Diabetes	39.7	32.7	36.2	4.9	3.3	4.1	210.7	194.7	1.026	1	6
215	Female	41 a 65 años	53	0.9	73.2347	28	Overweight	116	77	Normotension	29.2	25.3	27.25	117.4	pre Diabetes	38.9	30.5	34.7	4.4	5.4	4.9	209.2	185.1	1.028	3	6
216	Female	41 a 65 años	53	0.75	91.295	25.2	Overweight	110	75	Normotension	26.7	25.3	26	102.5	pre Diabetes	35.3	32.6	33.95	2.5	4	3.25	212.7	164.1	1.029	3	8
217	Female	41 a 65 años	53	0.75	91.295	26.3	Overweight	128	79	Pre Hipertension	25.6	28.9	27.25	102.5	pre Diabetes	31.4	38.3	34.85	4.7	4.7	4.7	213.4	184.7	1.029	2	8
218	Female	41 a 65 años	53	0.85	78.4745	27.6	Overweight	125	77	Pre Hipertension	25.6	28	26.8	123.1	pre Diabetes	26.5	30.1	28.3	5	2.5	3.75	212.5	179.8	1.033	1	7
219	Female	41 a 65 años	53	0.95	68.6007	27.1	Overweight	126	76	Pre Hipertension	26.1	29.7	27.9	102.9	pre Diabetes	25.8	28.3	27.05	5.1	4.9	5	220	167.7	1.029	2	7
220	Female	41 a 65 años	53	0.8	84.4424	28.4	Overweight	121	77	Pre Hipertension	28	26.1	27.05	117	pre Diabetes	38.3	36.1	37.2	4.7	4.5	4.6	205.3	185.4	1.026	10	8
221	Female	41 a 65 años	53	0.8	84.4424	27.6	Overweight	124	76	Pre Hipertension	28.4	29.5	28.95	130.5	Diabetes	39.9	27.6	33.75	4.2	2.7	3.45	216.4	158.6	1.031	1	6
222	Female	41 a 65 años	53	0.85	78.4745	25.3	Overweight	125	75	Pre Hipertension	25.1	29.2	27.15	132.3	Diabetes	27.1	33.2	30.15	4.9	5.3	5.1	222.1	161.1	1.031	1	5
223	Female	41 a 65 años	53	0.9	73.2347	27.3	Overweight	122	80	Pre Hipertension	28.6	28.8	28.7	78.8	normal glucose	34.7	38.5	36.6	4.7	4.8	4.75	217.4	152.8	1.033	3	5
224	Female	41 a 65 años	53	0.75	91.295	25.7	Overweight	122	76	Pre Hipertension	27.8	27.4	27.6	79.7	normal glucose	39.1	30.8	34.95	3.5	2.6	3.05	205.9	173.2	1.027	2	6
225	Female	41 a 65 años	53	0.8	84.4424	26.1	Overweight	122	78	Pre Hipertension	26.2	25.3	25.75	91.2	normal glucose	27.4	28.9	28.15	3.3	3.8	3.55	212.9	183.2	1.033	0	6
226	Female	41 a 65 años	53	0.95	68.6007	27.2	Overweight	128	76	Pre Hipertension	28.1	29.8	28.95	86.5	normal glucose	34.6	33.4	34	3.1	2.9	3	224.6	165.1	1.025	2	6
227	Female	41 a 65 años	53	0.85	78.4745	25.7	Overweight	135	87	Hipertension grade I	25.1	27.1	26.1	74.8	normal glucose	26.4	39	32.7	3.6	3.9	3.75	234	160.5	1.025	2	5
228	Female	41 a 65 años	53	0.95	68.6007	26	Overweight	136	87	Hipertension grade I	25.3	27.7	26.5	116.5	pre Diabetes	31.8	38.2	35	3.1	5.2	4.15	236.1	196.5	1.025	2	6
229	Female	41 a 65 años	53	0.8	84.4424	27.9	Overweight	130	81	Hipertension grade I	27.1	28.6	27.85	111	pre Diabetes	32.7	37.5	35.1	4.2	4.1	4.15	238.6	162.2	1.034	1	5
230	Female	41 a 65 años	53	0.8	84.4424	27.4	Overweight	146	92	Hipertension grade II	29.7	29.8	29.75	129.5	Diabetes	33.7	28.2	30.95	5.5	3.9	4.7	230	151.8	1.029	0	5
231	Female	41 a 65 años	53	0.9	73.2347	27.8	Overweight	148	92	Hipertension grade II	28.4	27.3	27.85	125.2	Diabetes	29	33.5	31.25	4.4	3.8	4.1	201.8	157	1.028	2	6
232	Male	66 a 80 años	73	0.95	79.0907	28.5	Overweight	136	88	Hipertension grade I	25.7	28.4	27.05	81	normal glucose	33.3	39.3	36.3	4.5	3.5	4	238.1	167.9	1.033	1	5
233	Male	66 a 80 años	73	0.75	91.0034	25.9	Overweight	130	87	Hipertension grade I	28.7	26	27.35	76	normal glucose	39.5	28.7	34.1	5.5	6.5	6	230.3	175.8	1.033	1	6
234	Male	66 a 80 años	73	1.05	70.077	25.9	Overweight	133	88	Hipertension grade I	26.5	26.5	26.5	74.1	normal glucose	33.8	31	32.4	5.5	6.5	6	223.9	183.4	1.025	1	6
235	Male	66 a 80 años	73	0.85	86.4404	27.1	Overweight	114	79	Normotension	28.5	28.7	28.6	81.7	normal glucose	30.6	32.6	31.6	5.5	3.5	4.5	237.1	164.1	1.028	0	7
236	Male	66 a 80 años	73	0.9	84.4334	25.5	Overweight	117	76	Normotension	29.4	25.6	27.5	95.8	normal glucose	28.1	25.4	26.75	4.5	6.5	5.5	211.7	165.1	1.028	1	7
237	Male	66 a 80 años	73	0.75	91.0034	30	Overweight	115	75	Normotension	26.2	28.1	27.15	73.9	normal glucose	33.3	34.7	34	5.5	6.5	6	209.9	190.7	1.029	0	8
238	Male	66 a 80 años	73	0.9	84.4334	28.1	Overweight	114	75	Normotension	26.4	25.1	25.75	86	normal glucose	38.1	30.9	34.5	4.5	5.5	5	212.6	168.1	1.034	2	8
239	Male	66 a 80 años	73	1	74.335	29.1	Overweight	119	79	Normotension	25	27	26	94.6	normal glucose	29.3	37.5	33.4	4.5	3.5	4	211.4	179.5	1.031	50	8
240	Male	66 a 80 años	73	1	74.335	26.7	Overweight	145	96	Hipertension grade II	27.4	26.5	26.95	83.4	normal glucose	39.9	37	38.45	5.5	3.5	4.5	227.3	166.6	1.024	1	5
241	Male	66 a 80 años	73	1	74.335	25.9	Overweight	146	93	Hipertension grade II	26.4	28.8	27.6	96.7	normal glucose	37.2	31.8	34.5	6.5	3.5	5	201.5	162.6	1.031	1	6
242	Male	66 a 80 años	73	1	74.335	29.8	Overweight	142	92	Hipertension grade II	27.3	28	27.65	109.3	pre Diabetes	39.3	36.7	38	3.5	4.5	4	228	192.1	1.029	0	6
243	Male	66 a 80 años	73	1.15	62.7783	28.5	Overweight	120	78	Pre Hipertension	29.8	27	28.4	116.2	pre Diabetes	32.8	35.1	33.95	5.5	4.5	5	229.3	153.6	1.034	3	5
244	Male	66 a 80 años	73	0.95	79.0907	26.4	Overweight	127	79	Pre Hipertension	26.9	29.6	28.25	117.2	pre Diabetes	36.9	38.6	37.75	6.5	6.5	6.5	202.1	151.1	1.032	2	6
245	Male	66 a 80 años	73	0.9	84.4334	27.6	Overweight	126	75	Pre Hipertension	27.4	29.1	28.25	123.3	pre Diabetes	25.7	37.1	31.4	6.5	4.5	5.5	209.5	186.6	1.029	1	6
246	Male	66 a 80 años	73	0.5	107.506	27.3	Overweight	129	78	Pre Hipertension	29	26.6	27.8	134.1	Diabetes	31	26.7	28.85	4.5	5.5	5	215.8	167	1.031	2	5
247	Male	66 a 80 años	73	0.7	93.6209	29.2	Overweight	121	80	Pre Hipertension	28.7	26.4	27.55	134.4	Diabetes	34.8	29.6	32.2	3.5	6.5	5	221.7	189.3	1.023	1	6
248	Male	66 a 80 años	73	1.1	66.2445	27.1	Overweight	134	81	Hipertension grade I	27.4	28.5	27.95	88.1	normal glucose	36	25.4	30.7	5.5	3.5	4.5	218.5	160	1.028	1	6
249	Male	66 a 80 años	73	1.05	70.077	29.6	Overweight	132	87	Hipertension grade I	25.4	27.3	26.35	92.4	normal glucose	33.1	28.9	31	6.5	5.5	6	223.3	185.3	1.024	1	6
250	Male	66 a 80 años	73	1	74.335	27	Overweight	137	81	Hipertension grade I	26.8	26.7	26.75	78.7	normal glucose	27.7	33.7	30.7	4.5	4.5	4.5	224.3	155.5	1.035	3	6
251	Male	66 a 80 años	73	1	74.335	25	Overweight	146	90	Hipertension grade II	25.3	28.6	26.95	74.3	normal glucose	32.8	39.5	36.15	6.5	4.5	5.5	207.6	177.7	1.031	3	6
252	Male	66 a 80 años	73	1	74.335	27.8	Overweight	140	93	Hipertension grade II	28.5	29.3	28.9	88.7	normal glucose	30.5	34.5	32.5	5.5	4.5	5	215	151.8	1.033	1	6
253	Male	66 a 80 años	73	0.85	86.4404	28.7	Overweight	125	76	Pre Hipertension	26.2	26.6	26.4	124.1	pre Diabetes	25.7	25.1	25.4	4.5	5.5	5	220.8	154.2	1.026	0	5
254	Male	66 a 80 años	73	1.05	70.077	26.1	Overweight	120	77	Pre Hipertension	27.3	28	27.65	116.7	pre Diabetes	30	37.7	33.85	4.5	4.5	4.5	227.8	151.8	1.033	2	5
255	Male	66 a 80 años	73	1.1	66.2445	27.3	Overweight	129	75	Pre Hipertension	27.4	26.1	26.75	100.2	pre Diabetes	32.1	33.7	32.9	5.5	6.5	6	221.1	154.1	1.035	1	5
256	Male	66 a 80 años	73	0.9	84.4334	28.8	Overweight	123	75	Pre Hipertension	29.4	28.8	29.1	123	pre Diabetes	36.7	34.9	35.8	4.5	5.5	5	211.9	180.5	1.025	0	6
257	Male	66 a 80 años	73	1.1	66.2445	26.9	Overweight	129	79	Pre Hipertension	28.5	27.1	27.8	129.5	Diabetes	28.3	36.9	32.6	6.5	4.5	5.5	235.7	162.1	1.031	0	6
258	Male	66 a 80 años	73	1.3	54.1297	25.7	Overweight	143	90	Hipertension grade II	29.3	25.9	27.6	128.3	Diabetes	34.3	30.5	32.4	5.5	3.5	4.5	200.5	162.1	1.029	3	6
259	Male	66 a 80 años	73	1	74.335	27.8	Overweight	144	91	Hipertension grade II	25.4	27	26.2	131.6	Diabetes	37.3	38.2	37.75	5.5	5.5	5.5	214.1	194.5	1.026	1	5
260	Male	66 a 80 años	73	1	74.335	27.7	Overweight	146	92	Hipertension grade II	26.1	28.5	27.3	97.6	normal glucose	31.6	28.2	29.9	3.5	4.5	4	232	182.3	1.029	1	6
261	Male	66 a 80 años	73	0.9	84.4334	25.8	Overweight	119	77	Normotension	27.7	26.5	27.1	93.3	normal glucose	25.7	38.7	32.2	5.5	5.5	5.5	217.6	189.3	1.027	3	7
262	Male	66 a 80 años	73	1.05	70.077	25.3	Overweight	117	76	Normotension	26.3	26.5	26.4	94.3	normal glucose	27.4	33.4	30.4	5.5	4.5	5	218.3	182.8	1.034	2	8
263	Male	66 a 80 años	73	1.2	59.6298	29.4	Overweight	115	80	Normotension	25.5	29.4	27.45	79.3	normal glucose	30.5	30.8	30.65	6.5	6.5	6.5	232.4	164.6	1.028	3	7
264	Male	66 a 80 años	73	1.2	59.6298	29.1	Overweight	120	79	Normotension	29.8	26.6	28.2	96.7	normal glucose	27.1	32.5	29.8	6.5	6.5	6.5	202.1	170.3	1.027	3	8
265	Male	66 a 80 años	73	0.9	84.4334	26.2	Overweight	119	76	Normotension	25.4	29.6	27.5	113.2	pre Diabetes	36.7	36.5	36.6	6.5	3.5	5	228.6	162.8	1.024	3	8
266	Male	66 a 80 años	73	1	74.335	27.2	Overweight	134	87	Hipertension grade I	29.7	27.9	28.8	109.6	pre Diabetes	34.8	35.9	35.35	5.5	3.5	4.5	208.3	159.1	1.026	2	6
267	Male	66 a 80 años	73	0.8	88.6213	26.2	Overweight	131	85	Hipertension grade I	25.3	29.4	27.35	120.4	pre Diabetes	37	31.4	34.2	6.5	6.5	6.5	220.3	178.2	1.024	1	8
268	Male	66 a 80 años	73	1.1	66.2445	27	Overweight	137	87	Hipertension grade I	29.4	29.9	29.65	114.3	pre Diabetes	28.8	37.7	33.25	6.5	6.5	6.5	231.1	163.1	1.024	1	5
269	Male	66 a 80 años	73	1.05	70.077	25.9	Overweight	148	94	Hipertension grade II	27.6	29.3	28.45	134.6	Diabetes	34.8	30.3	32.55	6.5	4.5	5.5	233.3	179	1.034	2	5
270	Male	66 a 80 años	73	0.85	86.4404	27.9	Overweight	146	95	Hipertension grade II	26.8	25.7	26.25	128.2	Diabetes	28.1	37.4	32.75	5.5	5.5	5.5	202.9	194.4	1.032	2	5
271	Female	66 a 80 años	73	0.85	68.1889	29.3	Overweight	113	76	Normotension	29.7	28.5	29.1	71.6	normal glucose	29.4	26.8	28.1	3.3	3.9	3.6	213.3	174.8	1.034	2	8
272	Female	66 a 80 años	73	0.95	59.6092	29.6	Overweight	117	76	Normotension	25.5	28.3	26.9	78.8	normal glucose	39.7	32.7	36.2	5.3	4.4	4.85	238.6	181.9	1.023	3	7
273	Female	66 a 80 años	73	0.8	73.3745	25.6	Overweight	111	80	Normotension	25.8	28.5	27.15	80.1	normal glucose	38	36.2	37.1	3.3	4.4	3.85	225.6	193.1	1.033	3	8
274	Female	66 a 80 años	73	0.85	68.1889	26.9	Overweight	112	76	Normotension	26.5	28.5	27.5	90.6	normal glucose	35.8	32.1	33.95	3.8	3.1	3.45	209	157.4	1.027	1	7
275	Female	66 a 80 años	73	1.05	52.8157	25.8	Overweight	115	80	Normotension	29.8	27.9	28.85	81.1	normal glucose	35	39.6	37.3	5.5	4.6	5.05	235.7	177.8	1.033	3	8
276	Female	66 a 80 años	73	1	56.0249	27.7	Overweight	125	80	Pre Hipertension	26.7	27	26.85	126.4	Diabetes	31.2	27.3	29.25	4.8	3.5	4.15	215.4	191.6	1.029	2	5
277	Female	66 a 80 años	73	0.85	68.1889	28.6	Overweight	127	79	Pre Hipertension	26.2	27.3	26.75	85.3	normal glucose	27.2	26.1	26.65	3	2.6	2.8	201.4	192.2	1.029	0	6
278	Female	66 a 80 años	73	0.95	59.6092	27.5	Overweight	121	77	Pre Hipertension	25.5	25.2	25.35	74.2	normal glucose	26.1	31.2	28.65	3.3	5.3	4.3	221.5	150.7	1.028	1	6
279	Female	66 a 80 años	73	0.9	63.6359	27.8	Overweight	124	76	Pre Hipertension	28	26.9	27.45	82	normal glucose	30.4	32.5	31.45	5.1	4.7	4.9	235.5	182.6	1.029	0	5
280	Female	66 a 80 años	73	0.75	79.329	27.8	Overweight	127	78	Pre Hipertension	26.3	25.4	25.85	71.6	normal glucose	34.7	25.5	30.1	3.5	2.9	3.2	201.2	171.2	1.028	3	5
281	Female	66 a 80 años	73	0.8	73.3745	25.6	Overweight	121	75	Pre Hipertension	26.5	28.5	27.5	72.2	normal glucose	32	32.7	32.35	4.3	3	3.65	220.7	159.1	1.023	0	5
282	Female	66 a 80 años	73	0.65	88.3581	28.6	Overweight	128	76	Pre Hipertension	26.1	29.8	27.95	126.3	Diabetes	29.8	27	28.4	3	3.2	3.1	205.1	181.7	1.026	2	6
283	Female	66 a 80 años	73	0.7	86.2299	29.9	Overweight	129	76	Pre Hipertension	28	41.5	34.75	80.3	normal glucose	36.5	32	34.25	4.5	3.6	4.05	201.2	163.3	1.032	1	7
284	Female	66 a 80 años	73	0.8	73.3745	29.3	Overweight	120	75	Pre Hipertension	27.3	288.1	157.7	89.4	normal glucose	35.3	36.7	36	3.3	4.3	3.8	217.8	152.7	1.029	1	7
285	Female	66 a 80 años	73	0.75	79.329	29.7	Overweight	121	79	Pre Hipertension	29	25.9	27.45	90.4	normal glucose	30.6	29.3	29.95	5.2	4.1	4.65	214.4	157.1	1.028	0	7
286	Female	66 a 80 años	73	0.95	59.6092	27.8	Overweight	132	84	Hipertension grade I	27.2	27.4	27.3	90.5	normal glucose	29	27.1	28.05	3.1	3.3	3.2	222.9	186.2	1.032	2	8
287	Female	66 a 80 años	73	0.95	59.6092	25.7	Overweight	130	89	Hipertension grade I	29.5	28.6	29.05	78	normal glucose	38.3	30.8	34.55	2.7	4.6	3.65	217.4	196.4	1.032	10	7
288	Female	66 a 80 años	73	1.3	40.7966	26.1	Overweight	131	87	Hipertension grade I	26.7	29.1	27.9	121.6	pre Diabetes	38	27.9	32.95	2.9	4.7	3.8	213.7	168.8	1.029	0	5
289	Female	66 a 80 años	73	0.95	59.6092	25.6	Overweight	145	92	Hipertension grade II	27.6	29.4	28.5	114	pre Diabetes	27.3	25.5	26.4	2.7	3.7	3.2	234.3	193.2	1.023	2	5
290	Female	66 a 80 años	73	0.9	63.6359	29.4	Overweight	140	90	Hipertension grade II	28.5	25.1	26.8	108	pre Diabetes	29.9	37.4	33.65	4.2	4.1	4.15	230.6	185.2	1.033	1	6
291	Female	66 a 80 años	73	0.85	68.1889	29.5	Overweight	141	90	Hipertension grade II	25.2	27.4	26.3	119.1	pre Diabetes	31.5	29	30.25	3.2	4.6	3.9	230.6	152.2	1.031	2	5
292	Female	66 a 80 años	73	0.8	73.3745	27.8	Overweight	113	75	Normotension	28.7		28.7	132.6	Diabetes	39.7	32.3	36	3	3.7	3.35	204.5	186.6	1.033	0	6
293	Female	66 a 80 años	73	0.85	68.1889	28.2	Overweight	119	79	Normotension	29.5	27	28.25	74.1	normal glucose	25.9	37.1	31.5	5.4	3	4.2	201.1	164	1.027	2	5
294	Female	66 a 80 años	73	0.8	73.3745	27.7	Overweight	117	75	Normotension	25.1	28.2	26.65	95.5	normal glucose	38.1	27.4	32.75	3.1	4.1	3.6	219.3	192.3	1.024	1	8
295	Female	66 a 80 años	73	0.65	88.3581	27.1	Overweight	113	76	Normotension	28.1	29.9	29	74.4	normal glucose	36.8	29.5	33.15	4.8	2.6	3.7	231.9	150.9	1.024	0	8
296	Female	66 a 80 años	73	0.7	86.2299	25.5	Overweight	114	80	Normotension	29.6	25.9	27.75	75.6	normal glucose	25.6	31.9	28.75	4.1	3	3.55	239	158.1	1.026	1	8
297	Female	66 a 80 años	73	1	56.0249	25.1	Overweight	132	82	Hipertension grade I	28		28	95.4	normal glucose	42	42	42	3.3	3.3	3.3	212.5	170.4	1.031	2	8
298	Female	66 a 80 años	73	0.85	68.1889	28.2	Overweight	139	82	Hipertension grade I	29.8	27	28.4	106.6	pre Diabetes	36.3	33.9	35.1	3.5	3.8	3.65	212.2	162.3	1.034	2	8
299	Female	66 a 80 años	73	1.1	49.9272	27.6	Overweight	132	80	Hipertension grade I	25.5	28	26.75	108.5	pre Diabetes	35.8	32.3	34.05	3.2	4.1	3.65	213.9	175.1	1.029	2	6
300	Female	66 a 80 años	73	0.95	59.6092	27.8	Overweight	145	94	Hipertension grade II	26.7		26.7	125.5	Diabetes	25.5	37.2	31.35	5.3	4.2	4.75	216	152.8	1.029	3	6
301	Female	66 a 80 años	73	1.15	47.3149	26.3	Overweight	145	95	Hipertension grade II	30	27.8	28.9	125	Diabetes	37.7	37.9	37.8	5.4	2.6	4	220	173.4	1.032	0	6
302	Female	> 80 años	85	1.15	43.4899	26.6	Overweight	121	75	Pre Hipertension	26.7	27.7	27.2	76	normal glucose	30	32.5	31.25	5.5	4.5	5	203.8	182	1.029	0	6
303	Male	> 80 años	85	1.1	60.8893	26.2	Overweight	129	79	Pre Hipertension	28.3	26.9	27.6	84.3	normal glucose	37.9	26.4	32.15	3.5	5.5	4.5	215.9	169.3	1.029	1	5
304	Male	> 80 años	85	0.95	72.697	25.2	Overweight	120	76	Pre Hipertension	25.4	26.6	26	97.8	normal glucose	27.8	29.5	28.65	4.5	3.5	4	211.4	181	1.033	0	8
305	Male	> 80 años	85	0.95	72.697	28.6	Overweight	128	79	Pre Hipertension	26.6	28.4	27.5	80	normal glucose	38.3	33.4	35.85	4.5	4.5	4.5	235.3	170.5	1.031	0	8
306	Male	> 80 años	85	0.95	72.697	29.6	Overweight	120	79	Pre Hipertension	26	26.9	26.45	90.1	normal glucose	32.6	37.2	34.9	4.5	4.5	4.5	210.2	167.6	1.033	3	7
307	Male	> 80 años	85	0.95	72.697	26.1	Overweight	138	86	Hipertension grade I	28.9	29.5	29.2	108.6	pre Diabetes	27.2	29	28.1	3.5	6.5	5	238.3	188.9	1.029	2	7
308	Male	> 80 años	85	0.95	72.697	26.7	Overweight	131	89	Hipertension grade I	25.3	26.7	26	115.4	pre Diabetes	25.9	25.6	25.75	4.5	4.5	4.5	226.1	182.8	1.025	0	7
309	Male	> 80 años	85	0.95	72.697	25.3	Overweight	135	85	Hipertension grade I	26.7	27.9	27.3	122.3	pre Diabetes	34.2	39.2	36.7	5.5	4.5	5	235.6	194	1.027	50	6
310	Male	> 80 años	85	0.75	83.6467	25.7	Overweight	117	77	Normotension	27.9	25.4	26.65	120.6	pre Diabetes	29	32.6	30.8	3.5	6.5	5	237.5	153.6	1.025	0	6
311	Male	> 80 años	85	1.1	60.8893	26.2	Overweight	119	77	Normotension	29.7	29.2	29.45	107.8	pre Diabetes	33.5	27.7	30.6	3.5	3.5	3.5	219.9	180.6	1.027	1	6
312	Male	> 80 años	85	0.95	72.697	29	Overweight	114	78	Normotension	26.5	25.2	25.85	123.4	pre Diabetes	37.1	32.6	34.85	5.5	6.5	6	217	161.4	1.027	2	6
313	Male	> 80 años	85	1.2	54.8093	28	Overweight	115	78	Normotension	27.2	26	26.6	122.6	pre Diabetes	36.9	39.2	38.05	4.5	4.5	4.5	239.3	155.7	1.023	1	6
314	Male	> 80 años	85	0.7	86.0525	26.7	Overweight	110	79	Normotension	28.7	26.7	27.7	104.1	pre Diabetes	31.2	38	34.6	5.5	3.5	4.5	230	188.5	1.026	0	7
315	Male	> 80 años	85	1.75	34.7337	27.2	Overweight	122	75	Pre Hipertension	25.9	25.8	25.85	101.7	pre Diabetes	28.4	39.9	34.15	3.5	4.5	4	219.2	162.9	1.031	2	5
316	Male	> 80 años	85	1.75	34.7337	29.9	Overweight	126	80	Pre Hipertension	26	28.1	27.05	112.8	pre Diabetes	36.8	31.2	34	3.5	5.5	4.5	233.3	166.6	1.028	3	5
317	Male	> 80 años	85	1.1	60.8893	29	Overweight	131	88	Hipertension grade I	27.8	25.6	26.7	101.3	pre Diabetes	27.7	37.5	32.6	3.5	5.5	4.5	202.1	167.3	1.031	3	6
318	Male	> 80 años	85	0.7	86.0525	27.3	Overweight	132	89	Hipertension grade I	28.6	29.2	28.9	119.1	pre Diabetes	35.5	36.5	36	5.5	6.5	6	222.6	158.1	1.034	0	6
319	Male	> 80 años	85	0.7	86.0525	26.9	Overweight	130	81	Hipertension grade I	28	25.5	26.75	83.5	normal glucose	33.8	29	31.4	6.5	4.5	5.5	233.5	152	1.024	2	5
320	Male	> 80 años	85	0.9	77.6078	29.1	Overweight	141	94	Hipertension grade II	26.4	29.3	27.85	78.6	normal glucose	25.9	34.4	30.15	4.5	5.5	5	239.2	187.8	1.032	1	5
321	Male	> 80 años	85	0.9	77.6078	29.9	Overweight	146	90	Hipertension grade II	27.5	25.6	26.55	90.4	normal glucose	33.6	28.7	31.15	6.5	6.5	6.5	210.4	176.6	1.024	0	7
322	Male	> 80 años	85	1.3	49.7539	26.1	Overweight	113	75	Normotension	26.4	29	27.7	75.2	normal glucose	33.7	28	30.85	3.5	3.5	3.5	201.4	166.5	1.029	3	7
323	Male	> 80 años	85	0.95	72.697	26.2	Overweight	114	78	Normotension	25.5	28.4	26.95	92.3	normal glucose	38.1	34.9	36.5	6.5	6.5	6.5	220.3	184.8	1.034	0	8
324	Male	> 80 años	85	0.95	72.697	28.3	Overweight	115	76	Normotension	27.6	28.6	28.1	95.1	normal glucose	38.1	38.8	38.45	5.5	4.5	5	204.4	162.6	1.034	1	7
325	Male	> 80 años	85	0.9	77.6078	29.4	Overweight	110	76	Normotension	25.9	25.9	25.9	97	normal glucose	32.2	28.2	30.2	3.5	6.5	5	200.4	192.4	1.025	2	7
326	Male	> 80 años	85	0.8	81.4571	27	Overweight	114	80	Normotension	29.7	28.3	29	93.7	normal glucose	35.8	35.2	35.5	4.5	4.5	4.5	227.9	176	1.026	3	6
327	Male	> 80 años	85	0.95	72.697	25.7	Overweight	148	91	Hipertension grade II	27.5	28.5	28	86.5	normal glucose	35.1	30.6	32.85	5.5	4.5	5	204.9	191.3	1.028	0	6
328	Male	> 80 años	85	1.2	54.8093	25.8	Overweight	142	94	Hipertension grade II	27.5	27.8	27.65	72.8	normal glucose	26.6	36.7	31.65	3.5	6.5	5	211.6	181.4	1.034	0	6
329	Male	> 80 años	85	1	68.3258	27.6	Overweight	141	95	Hipertension grade II	26.7	25.5	26.1	133.6	Diabetes	35.2	28.2	31.7	6.5	4.5	5.5	224.7	174.9	1.028	0	6
330	Male	> 80 años	85	1	68.3258	26.9	Overweight	140	91	Hipertension grade II	25.9	25.7	25.8	130.3	Diabetes	31.1	32.7	31.9	6.5	6.5	6.5	204.6	154.2	1.029	0	6
331	Female	> 80 años	85	0.6	83.3823	26.3	Overweight	119	77	Normotension	25.1	28.5	26.8	90.9	normal glucose	34.5	32.4	33.45	5.5	4.5	5	223.8	153.3	1.029	1	6
332	Female	> 80 años	85	1.05	48.5461	27.9	Overweight	120	76	Normotension	28.6	26.6	27.6	75	normal glucose	34.6	34.1	34.35	3.2	3.4	3.3	236.5	166.2	1.032	3	8
333	Female	> 80 años	85	0.95	54.7904	28.5	Overweight	116	76	Normotension	28	27.6	27.8	93.9	normal glucose	26.8	33.4	30.1	3	4	3.5	216.7	174.1	1.027	2	8
334	Female	> 80 años	85	0.4	95.2814	29.8	Overweight	113	80	Normotension	25.6	27.4	26.5	77.2	normal glucose	29.5	26.5	28	4.8	4.7	4.75	208.2	156.5	1.026	3	8
335	Female	> 80 años	85	0.75	72.916	25.3	Overweight	118	79	Normotension	28.2	29.4	28.8	93.5	normal glucose	30	28.4	29.2	5.2	3.4	4.3	215.6	192.6	1.024	3	8
336	Female	> 80 años	85	1.1	45.8911	28.6	Overweight	127	79	Pre Hipertension	26.4	159.8	93.1	111.4	pre Diabetes	32.8	28.4	30.6	4.2	3.2	3.7	221.8	183.6	1.026	0	7
337	Female	> 80 años	85	0.7	79.259	26.8	Overweight	120	79	Pre Hipertension	29.1	165.5	97.3	111.9	pre Diabetes	33.3	26.1	29.7	3.5	4.6	4.05	201	178.1	1.035	2	5
338	Female	> 80 años	85	1	51.4958	27.8	Overweight	128	76	Pre Hipertension	26.6	26.8	26.7	105.3	pre Diabetes	29.1	35.8	32.45	5.2	4.6	4.9	200	163.1	1.028	3	6
339	Female	> 80 años	85	1.4	34.2849	25.7	Overweight	120	75	Pre Hipertension	26.8	26.9	26.85	107.1	pre Diabetes	35.5	31.6	33.55	4.6	4.8	4.7	216.7	170.6	1.033	1	5
340	Female	> 80 años	85	0.8	67.4429	25.5	Overweight	124	78	Pre Hipertension	27.1	27.3	27.2	135.2	Diabetes	26.9	30.2	28.55	3.6	2.5	3.05	212.5	150.4	1.024	1	5
341	Female	> 80 años	85	0.9	58.4915	28.9	Overweight	131	82	Hipertension grade I	26.2	25.9	26.05	70.4	normal glucose	29.1	35.3	32.2	3.5	4.4	3.95	234.9	154.6	1.033	2	7
342	Female	> 80 años	85	0.9	58.4915	29.8	Overweight	135	82	Hipertension grade I	27.6	27.5	27.55	98.4	normal glucose	30.8	38.2	34.5	4.2	4.1	4.15	209.8	160.3	1.023	50	8
343	Female	> 80 años	85	0.75	72.916	29	Overweight	132	82	Hipertension grade I	28.4	25.6	27	92.5	normal glucose	25.8	37.5	31.65	5	2.9	3.95	213.6	167.4	1.025	1	8
344	Female	> 80 años	85	1	51.4958	28	Overweight	145	95	Hipertension grade II	27.3	25.9	26.6	97.3	normal glucose	31	27.1	29.05	2.9	5.2	4.05	239.9	178.3	1.033	2	8
345	Female	> 80 años	85	0.95	54.7904	26.8	Overweight	142	95	Hipertension grade II	28.3	27.2	27.75	76.6	normal glucose	26.2	28.6	27.4	2.8	3.3	3.05	207.9	173	1.024	1	8
346	Female	> 80 años	85	0.65	81.2152	26.1	Overweight	115	79	Normotension	27.9	26.2	27.05	95.5	normal glucose	38.4	25.2	31.8	3.1	4.7	3.9	225.2	151.1	1.031	2	5
347	Female	> 80 años	85	1.1	45.8911	26	Overweight	119	80	Normotension	27.3	28.3	27.8	90.5	normal glucose	32.9	38.1	35.5	4.7	3.5	4.1	207.2	164.4	1.029	0	6
348	Female	> 80 años	85	0.9	58.4915	25.3	Overweight	118	80	Normotension	27	26	26.5	81	normal glucose	38.2	31.4	34.8	3.7	4.9	4.3	219.5	165.7	1.028	2	6
349	Female	> 80 años	85	1.05	48.5461	29.9	Overweight	119	76	Normotension	28	26.5	27.25	84.4	normal glucose	29.6	35.2	32.4	2.8	5.1	3.95	203.3	151	1.026	1	5
350	Female	> 80 años	85	0.9	58.4915	27.9	Overweight	113	79	Normotension	27.6	226.1	126.85	73.3	normal glucose	32.8	31.3	32.05	5.3	2.6	3.95	211.1	171.2	1.025	3	5
351	Female	> 80 años	85	0.9	58.4915	29.4	Overweight	137	88	Hipertension grade I	27	29.3	28.15	82.1	normal glucose	36.9	39.4	38.15	4.1	3.2	3.65	218.4	180.2	1.029	2	8
352	Female	> 80 años	85	0.5	88.537	28.9	Overweight	137	84	Hipertension grade I	26.5	28.6	27.55	93	normal glucose	31.5	26.6	29.05	3.3	5.3	4.3	226	188.8	1.026	0	8
353	Female	> 80 años	85	1	51.4958	28.2	Overweight	134	85	Hipertension grade I	26.8	27.3	27.05	76.7	normal glucose	37.4	34.6	36	2.7	5.2	3.95	216.6	184.7	1.024	3	7
354	Female	> 80 años	85	1.05	48.5461	28.2	Overweight	145	90	Hipertension grade II	28.6	26.2	27.4	95.1	normal glucose	36.8	30	33.4	2.7	5.4	4.05	213	176	1.025	2	7
355	Female	> 80 años	85	1.05	48.5461	25.5	Overweight	144	93	Hipertension grade II	28.1	28.6	28.35	96.4	normal glucose	39.4	31.9	35.65	4.2	5.3	4.75	219	170.1	1.027	1	7
356	Female	> 80 años	85	0.75	72.916	26.7	Overweight	128	76	Pre Hipertension	26.5	25.6	26.05	102.3	pre Diabetes	25.7	31.1	28.4	5.4	4.5	4.95	226.9	166.4	1.027	1	6
357	Female	> 80 años	85	0.95	54.7904	27.3	Overweight	127	78	Pre Hipertension	27.3	29.4	28.35	112.7	pre Diabetes	31.4	27.6	29.5	4.7	3.3	4	218.9	169.3	1.031	2	5
358	Female	> 80 años	85	0.8	67.4429	28.3	Overweight	129	75	Pre Hipertension	27.5	29.1	28.3	103.1	pre Diabetes	32.6	36.7	34.65	2.9	4.6	3.75	238.5	167.5	1.031	2	5
359	Female	> 80 años	85	1	51.4958	25.4	Overweight	127	79	Pre Hipertension	25.5	27.6	26.55	115.5	pre Diabetes	25.5	32	28.75	3.9	3.7	3.8	210.4	197.1	1.029	2	6
360	Female	> 80 años	85	1.15	43.4899	27.1	Overweight	124	76	Pre Hipertension	26.6	25.3	25.95	125.2	Diabetes	32.3	33.1	32.7	3	3.1	3.05	208	164.8	1.031	2	5
361	Male	18 a 25 años	21.5	1	106.735	32.5	Obese	114	75	Normotension	25.3	77.1	51.2	96.5	normal glucose	29.4	34.5	31.95	6.6	5.1	5.85	226	167.1	1.029	0	6
362	Male	18 a 25 años	21.5	0.75	130.669	37.8	Obese	119	76	Normotension	28.4	29.3	28.85	88.3	normal glucose	36.5	34.2	35.35	6.9	5.5	6.2	236.9	152.4	1.033	2	7
363	Male	18 a 25 años	21.5	0.9	121.235	31.8	Obese	120	76	Normotension	29.5	29.9	29.7	80.3	normal glucose	26.8	31.1	28.95	5.9	5.5	5.7	238.1	159.1	1.033	2	8
364	Male	18 a 25 años	21.5	0.7	134.427	39.6	Obese	111	76	Normotension	27.6	27.3	27.45	82.1	normal glucose	38.9	36.6	37.75	6	6.6	6.3	233.9	188.4	1.027	0	8
365	Male	18 a 25 años	21.5	1.1	95.1181	33.4	Obese	116	75	Normotension	25.7	27.9	26.8	98.2	normal glucose	25.1	33.1	29.1	6.4	3.5	4.95	202.9	162.7	1.027	1	7
366	Male	18 a 25 años	21.5	1.15	90.1412	34	Obese	126	79	Pre Hipertension	26.9	28.6	27.75	102.1	pre Diabetes	34.8	31.4	33.1	5.7	6.2	5.95	206.1	179	1.024	1	8
367	Male	18 a 25 años	21.5	0.7	134.427	34.6	Obese	125	76	Pre Hipertension	27.8	27.3	27.55	123.7	pre Diabetes	31.8	28.9	30.35	6.1	4.8	5.45	234.1	195.7	1.029	2	5
368	Male	18 a 25 años	21.5	0.9	121.235	38.8	Obese	127	75	Pre Hipertension	27	29.6	28.3	122.1	pre Diabetes	30.4	38.9	34.65	6.1	4.4	5.25	201.9	190.8	1.033	0	6
369	Male	18 a 25 años	21.5	1.1	95.1181	37.9	Obese	126	80	Pre Hipertension	25.2	26.8	26	100.9	pre Diabetes	29.2	31.4	30.3	6.9	6.5	6.7	228.7	184.3	1.028	2	6
370	Male	18 a 25 años	21.5	0.75	130.669	31.8	Obese	121	80	Pre Hipertension	26.5	28.7	27.6	77.3	normal glucose	30.5	30.4	30.45	5.2	3.9	4.55	233.5	164.5	1.032	2	5
371	Male	18 a 25 años	21.5	0.9	121.235	34.4	Obese	137	88	Hipertension grade I	25.9	26.4	26.15	98.5	normal glucose	35.6	29.2	32.4	7.1	6.7	6.9	202.2	164.2	1.025	1	5
372	Male	18 a 25 años	21.5	0.9	121.235	38.2	Obese	133	89	Hipertension grade I	28.4	27.8	28.1	94.9	normal glucose	26.7	26.7	26.7	5.1	5.8	5.45	221.3	187.9	1.029	1	5
373	Male	18 a 25 años	21.5	0.95	113.564	35.5	Obese	134	84	Hipertension grade I	28.2	28.4	28.3	91.9	normal glucose	28	31.2	29.6	4.5	5.8	5.15	207.7	167	1.027	1	5
374	Male	18 a 25 años	21.5	1.05	100.621	39.9	Obese	148	90	Hipertension grade II	25.7	28.6	27.15	72.1	normal glucose	39.7	25.6	32.65	6.4	4.6	5.5	217.7	193.6	1.025	3	5
375	Male	18 a 25 años	21.5	0.8	127.248	32.4	Obese	146	96	Hipertension grade II	26	28.2	27.1	133.3	Diabetes	31.2	36.5	33.85	3.7	6.4	5.05	236.9	171.2	1.025	2	5
376	Female	18 a 25 años	21.5	0.9	91.3725	36.9	Obese	113	79	Normotension	27.7	147.5	87.6	80	normal glucose	25.4	29	27.2	4.5	4.8	4.65	200.3	187	1.033	0	7
377	Female	18 a 25 años	21.5	0.75	113.906	35.7	Obese	112	78	Normotension	26.5	25	25.75	89.2	normal glucose	33.7	29.5	31.6	3.5	4	3.75	223.6	157.6	1.024	0	7
378	Female	18 a 25 años	21.5	0.9	91.3725	34.2	Obese	114	76	Normotension	26.1	25.8	25.95	76.4	normal glucose	32.3	25.6	28.95	4.2	3.9	4.05	223.3	175.2	1.029	0	7
379	Female	18 a 25 años	21.5	0.9	91.3725	31.4	Obese	110	76	Normotension	26.1	28	27.05	87.9	normal glucose	39.3	39.9	39.6	5.4	4.1	4.75	218.2	151.2	1.028	1	7
380	Female	18 a 25 años	21.5	0.9	91.3725	36	Obese	116	77	Normotension	28.1	25.4	26.75	83.4	normal glucose	29	31.9	30.45	4.3	2.5	3.4	208.2	197.1	1.032	2	8
381	Female	18 a 25 años	21.5	0.9	91.3725	37.5	Obese	121	77	Pre Hipertension	27.6	29	28.3	90.9	normal glucose	25.5	29.6	27.55	5.1	4.4	4.75	211.5	168.8	1.025	3	5
382	Female	18 a 25 años	21.5	0.65	126.87	31.7	Obese	122	80	Pre Hipertension	27.9	283.2	155.55	87.9	normal glucose	37.3	32.7	35	3.9	4.8	4.35	234.9	153.5	1.029	1	5
383	Female	18 a 25 años	21.5	0.95	85.5908	33.4	Obese	123	77	Pre Hipertension	27.5	25.5	26.5	71.2	normal glucose	25.8	35.8	30.8	2.9	4.1	3.5	208.1	166.3	1.035	1	5
384	Female	18 a 25 años	21.5	0.65	126.87	31.2	Obese	127	76	Pre Hipertension	27.4	25.6	26.5	87	normal glucose	39.5	33.1	36.3	3	2.9	2.95	227.5	184	1.028	1	5
385	Female	18 a 25 años	21.5	1	80.4442	34.2	Obese	126	76	Pre Hipertension	26.7	25.1	25.9	74.4	normal glucose	36.7	39.9	38.3	2.6	4.9	3.75	206.6	196.6	1.034	3	5
386	Female	18 a 25 años	21.5	0.65	126.87	37.1	Obese	131	89	Hipertension grade I	28	28.8	28.4	104.9	pre Diabetes	31.5	36.5	34	3.4	4.4	3.9	205.1	185.3	1.028	0	5
387	Female	18 a 25 años	21.5	1	80.4442	34.2	Obese	134	88	Hipertension grade I	27.2	25.5	26.35	101.8	pre Diabetes	38.3	34	36.15	3.5	2.7	3.1	227.9	157.1	1.029	0	7
388	Female	18 a 25 años	21.5	1	80.4442	37.3	Obese	137	89	Hipertension grade I	29.2	28.2	28.7	107.6	pre Diabetes	33.4	32.3	32.85	4	3.8	3.9	201.8	175.6	1.028	50	7
389	Female	18 a 25 años	21.5	0.6	130.256	37.9	Obese	146	93	Hipertension grade II	26.9	28.5	27.7	116.2	pre Diabetes	35.4	39.1	37.25	3.5	3.8	3.65	210	176.7	1.023	1	7
390	Female	18 a 25 años	21.5	0.85	97.9101	38.8	Obese	142	93	Hipertension grade II	25.4	29	27.2	101.8	pre Diabetes	35.1	37.8	36.45	3.6	5.5	4.55	204.5	177.8	1.026	3	8
391	Female	18 a 25 años	21.5	1.15	67.9378	36.7	Obese	140	95	Hipertension grade II	26	27	26.5	119.6	pre Diabetes	31.5	29.8	30.65	5.1	3.5	4.3	217.1	193.3	1.032	0	8
392	Female	18 a 25 años	21.5	0.8	105.356	34	Obese	144	95	Hipertension grade II	25.7	28.3	27	119.3	pre Diabetes	45	45	45	3.1	2.6	2.85	225.9	158.8	1.029	3	6
393	Female	18 a 25 años	21.5	0.9	91.3725	39.6	Obese	110	78	Normotension	28.7	27.7	28.2	108.5	pre Diabetes	36.4	26.7	31.55	3.9	4.3	4.1	228.7	168.4	1.028	1	6
394	Female	18 a 25 años	21.5	0.9	91.3725	34.3	Obese	110	80	Normotension	27.9	29.3	28.6	135.5	Diabetes	35.8	35.9	35.85	4.3	3.5	3.9	222.4	174.6	1.032	3	5
395	Female	18 a 25 años	21.5	0.85	97.9101	34.7	Obese	118	76	Normotension	27.5	25.2	26.35	131.7	Diabetes	38.5	29.2	33.85	5.1	3.4	4.25	215.6	190.1	1.032	3	6
396	Female	18 a 25 años	21.5	0.7	123.814	33.7	Obese	120	75	Normotension	28	28.4	28.2	132.1	Diabetes	27.7	30.4	29.05	4.8	5.5	5.15	209.5	156	1.029	2	6
397	Female	18 a 25 años	21.5	0.7	123.814	30.9	Obese	114	79	Normotension	28.5	28	28.25	128.7	Diabetes	36.4	33.2	34.8	3.4	3.3	3.35	209	196	1.023	3	5
398	Female	18 a 25 años	21.5	0.85	97.9101	36.7	Obese	123	80	Pre Hipertension	28.6	28.9	28.75	98	normal glucose	29	29.5	29.25	3.1	5.3	4.2	202	156.7	1.033	2	7
399	Female	18 a 25 años	21.5	0.65	126.87	39.4	Obese	127	79	Pre Hipertension	28.9	45.1	37	89.7	normal glucose	25.3	30.5	27.9	4.7	4.5	4.6	222.7	160	1.031	2	7
400	Female	18 a 25 años	21.5	0.6	130.256	40	Obese	127	80	Pre Hipertension	29	28.2	28.6	76.4	normal glucose	39.5	34.1	36.8	4.4	3.4	3.9	207.3	190.1	1.033	3	8
401	Female	18 a 25 años	21.5	1.05	75.8363	36.7	Obese	127	76	Pre Hipertension	29.3	25.4	27.35	95.5	normal glucose	34.7	33.9	34.3	3	5.4	4.2	237.2	165.7	1.027	2	8
402	Female	18 a 25 años	21.5	0.6	130.256	36.5	Obese	122	78	Pre Hipertension	30	26.3	28.15	74.3	normal glucose	35.2	27.2	31.2	4.1	2.5	3.3	217	150.3	1.024	3	7
403	Female	18 a 25 años	21.5	1	80.4442	31.1	Obese	144	90	Hipertension grade II	28.7	27	27.85	134	Diabetes	25.5	27.8	26.65	4.4	5.4	4.9	231.9	192.5	1.024	3	6
404	Female	18 a 25 años	21.5	0.6	130.256	35.8	Obese	146	96	Hipertension grade II	28.3	25.2	26.75	125.9	Diabetes	34.7	28.7	31.7	4	2.8	3.4	234.8	188.3	1.026	3	6
405	Female	18 a 25 años	21.5	0.85	97.9101	39.9	Obese	146	92	Hipertension grade II	29.6	28.2	28.9	130.6	Diabetes	35.9	39.9	37.9	2.7	3.5	3.1	208.2	151.2	1.031	3	5
406	Female	18 a 25 años	21.5	0.95	85.5908	38.7	Obese	145	91	Hipertension grade II	26	29.9	27.95	128.7	Diabetes	25.4	30.8	28.1	3.4	4.9	4.15	231.5	157.4	1.034	1	6
407	Male	26 a 40 años	33	1.2	78.9757	39.1	Obese	111	79	Normotension	28.8	28.8	28.8	85.3	normal glucose	34.2	31.9	33.05	3.4	4.8	4.1	203.6	179.5	1.034	1	5
408	Male	26 a 40 años	33	1.1	87.7364	37.7	Obese	120	77	Normotension	27.1	28.4	27.75	90.7	normal glucose	25.2	27.3	26.25	4.1	4.5	4.3	228.1	163.5	1.029	2	7
409	Male	26 a 40 años	33	1.15	83.1457	36.5	Obese	117	78	Normotension	29.6	215.1	122.35	92.8	normal glucose	28.1	31.1	29.6	4	6	5	200.2	166.5	1.025	3	7
410	Male	26 a 40 años	33	0.8	117.373	34.8	Obese	120	78	Normotension	29.1	26.7	27.9	94.5	normal glucose	37.1	28.3	32.7	7	6.6	6.8	237.5	183.2	1.028	1	8
411	Male	26 a 40 años	33	0.95	104.75	37.7	Obese	117	80	Normotension	27.5	28.6	28.05	98.5	normal glucose	37.9	26.6	32.25	3.5	6.7	5.1	238	163.6	1.029	1	8
412	Male	26 a 40 años	33	1.15	83.1457	37.9	Obese	124	75	Pre Hipertension	25.9	28.9	27.4	110.3	pre Diabetes	30.5	31	30.75	5	3.6	4.3	201.5	164.1	1.031	0	8
413	Male	26 a 40 años	33	0.9	111.826	31.9	Obese	126	75	Pre Hipertension	27.4	26.3	26.85	105.2	pre Diabetes	28.3	26.3	27.3	3.9	6.8	5.35	214.5	193.6	1.027	2	6
414	Male	26 a 40 años	33	0.45	148.685	30.5	Obese	121	78	Pre Hipertension	29.6	26.9	28.25	100.3	pre Diabetes	38.9	38.4	38.65	4.8	3.1	3.95	214.4	156.1	1.033	3	5
415	Male	26 a 40 años	33	1.05	92.8123	35	Obese	124	78	Pre Hipertension	28.3	27.2	27.75	116.9	pre Diabetes	26.1	27.1	26.6	7	4.9	5.95	218	178.5	1.035	0	5
416	Male	26 a 40 años	33	0.9	111.826	36.2	Obese	126	76	Pre Hipertension	25.9	29.3	27.6	125.2	Diabetes	38.9	27.1	33	5.5	4.7	5.1	200.8	163	1.031	1	6
417	Male	26 a 40 años	33	0.9	111.826	37.2	Obese	129	75	Pre Hipertension	27.4	27.4	27.4	95.6	normal glucose	34.4	38	36.2	5.3	6.8	6.05	219.2	187.7	1.031	2	5
418	Male	26 a 40 años	33	0.7	123.995	35.3	Obese	128	77	Pre Hipertension	26.8	28.9	27.85	97.1	normal glucose	25.4	34.5	29.95	5.8	3.5	4.65	217.7	177.6	1.028	1	5
419	Male	26 a 40 años	33	0.95	104.75	34.6	Obese	124	76	Pre Hipertension	27.6	29.3	28.45	76.7	normal glucose	30.8	35.7	33.25	5.9	4.7	5.3	231.2	180.4	1.027	1	5
420	Male	26 a 40 años	33	0.9	111.826	34.3	Obese	125	79	Pre Hipertension	28.7	29.6	29.15	72	normal glucose	28.5	31.6	30.05	6.7	4.5	5.6	232.3	173.8	1.034	0	6
421	Male	26 a 40 años	33	1.2	78.9757	32.5	Obese	124	76	Pre Hipertension	29.3	234.4	131.85	84	normal glucose	30.5	27.2	28.85	7.5	4.5	6	221.7	168.9	1.035	3	6
422	Male	26 a 40 años	33	1	98.4518	33.6	Obese	130	87	Hipertension grade I	29.3	27.1	28.2	133.5	Diabetes	31.3	29.5	30.4	4.9	6.6	5.75	222.2	165.6	1.031	0	8
423	Male	26 a 40 años	33	1.15	83.1457	37.1	Obese	139	85	Hipertension grade I	27.9	29	28.45	130.7	Diabetes	36.6	37.9	37.25	5.2	5.9	5.55	217	182.7	1.028	2	7
424	Male	26 a 40 años	33	0.75	120.528	37.8	Obese	136	84	Hipertension grade I	28.2	28.4	28.3	136	Diabetes	25.8	28.6	27.2	4.8	3.5	4.15	225.6	176.9	1.033	3	7
425	Male	26 a 40 años	33	0.95	104.75	32.1	Obese	143	95	Hipertension grade II	27.1	29	28.05	130.6	Diabetes	39.4	34.4	36.9	6.1	4.2	5.15	205.2	181.2	1.023	0	7
426	Male	26 a 40 años	33	0.9	111.826	38.9	Obese	143	96	Hipertension grade II	29.9	25.6	27.75	135.4	Diabetes	39.9	25.7	32.8	3.2	6.8	5	210.8	166.2	1.023	3	7
427	Male	26 a 40 años	33	1.05	92.8123	33.8	Obese	147	90	Hipertension grade II	29.9	28.8	29.35	130.9	Diabetes	32.1	25.3	28.7	3.4	6.1	4.75	212.3	169.9	1.026	0	6
428	Male	26 a 40 años	33	0.8	117.373	34.2	Obese	141	96	Hipertension grade II	27.4	27.9	27.65	135.4	Diabetes	37.7	27.9	32.8	6.2	5.7	5.95	207.2	160.9	1.029	3	5
429	Male	26 a 40 años	33	1	98.4518	34.5	Obese	147	91	Hipertension grade II	26.8	28.6	27.7	135.1	Diabetes	25.8	38.3	32.05	7	4	5.5	206	162.8	1.028	1	5
430	Male	26 a 40 años	33	1	98.4518	34.4	Obese	144	91	Hipertension grade II	29.5	29.9	29.7	132.7	Diabetes	36.5	26.3	31.4	3.5	5.6	4.55	235.6	180.3	1.029	3	5
431	Male	26 a 40 años	33	1.15	83.1457	31.7	Obese	148	90	Hipertension grade II	28.8	29.1	28.95	132.8	Diabetes	33.7	25.8	29.75	5.5	6.6	6.05	217.4	155.1	1.025	3	6
432	Female	26 a 40 años	33	0.9	84.2815	39.4	Obese	111	79	Normotension	28.7	29.1	28.9	77	normal glucose	39.3	37.2	38.25	2.6	4	3.3	208.8	161.5	1.028	2	6
433	Female	26 a 40 años	33	0.9	84.2815	33.6	Obese	113	79	Normotension	27.2	29.5	28.35	77.7	normal glucose	35.4	35	35.2	2.9	3.2	3.05	232.4	188.4	1.031	2	6
434	Female	26 a 40 años	33	0.75	105.066	31.3	Obese	118	78	Normotension	25.7	27.1	26.4	96.9	normal glucose	31.4	37.9	34.65	3.9	3.5	3.7	209.2	182.2	1.034	0	7
435	Female	26 a 40 años	33	1	74.2013	39.7	Obese	112	78	Normotension	30	26	28	83.1	normal glucose	36.4	25.5	30.95	4	3.5	3.75	237.2	170.4	1.031	3	7
436	Female	26 a 40 años	33	0.85	90.3116	34	Obese	111	80	Normotension	28.5	294.6	161.55	79.4	normal glucose	30.6	28.5	29.55	3.6	3.7	3.65	238.8	186.5	1.028	1	8
437	Female	26 a 40 años	33	0.65	117.024	38.1	Obese	125	75	Pre Hipertension	28.9	28.4	28.65	109.9	pre Diabetes	28.4	33.1	30.75	5	4.6	4.8	206.3	151.1	1.025	3	7
438	Female	26 a 40 años	33	1	74.2013	31.1	Obese	121	78	Pre Hipertension	27.8	27	27.4	123.8	pre Diabetes	33.4	34.9	34.15	4.1	4.4	4.25	233.4	187	1.027	2	7
439	Female	26 a 40 años	33	0.9	84.2815	30.8	Obese	126	78	Pre Hipertension	25.5	26.3	25.9	118.5	pre Diabetes	33.7	39.9	36.8	4.3	3.6	3.95	206.4	176.5	1.024	1	6
440	Female	26 a 40 años	33	0.95	78.9484	35.5	Obese	125	79	Pre Hipertension	25.9	29.4	27.65	114.8	pre Diabetes	33.4	39.2	36.3	4.8	2.7	3.75	227.5	167.3	1.025	2	5
441	Female	26 a 40 años	33	0.7	114.206	38.6	Obese	129	79	Pre Hipertension	25.8	28.5	27.15	129.8	Diabetes	35	38.9	36.95	4.6	4.5	4.55	230.5	194.3	1.025	2	5
442	Female	26 a 40 años	33	0.65	117.024	38.4	Obese	138	80	Hipertension grade I	28.8	28.9	28.85	96.9	normal glucose	34.6	26.9	30.75	5.1	2.6	3.85	214.9	168.6	1.029	2	6
443	Female	26 a 40 años	33	0.85	90.3116	31.9	Obese	135	84	Hipertension grade I	27.4	28.2	27.8	88.9	normal glucose	27.6	31.3	29.45	4.8	2.8	3.8	212.5	181.9	1.027	2	6
444	Female	26 a 40 años	33	0.65	117.024	38.6	Obese	136	88	Hipertension grade I	25.3	29.5	27.4	96.3	normal glucose	28	31.7	29.85	3.1	4.1	3.6	205.4	177.7	1.029	1	6
445	Female	26 a 40 años	33	0.75	105.066	32.9	Obese	136	81	Hipertension grade I	29.7	29.6	29.65	92.6	normal glucose	29.3	31.7	30.5	2.8	3.3	3.05	216.5	153.7	1.029	1	6
446	Female	26 a 40 años	33	0.65	117.024	38.1	Obese	138	88	Hipertension grade I	29	26.4	27.7	77.2	normal glucose	37.7	28.9	33.3	2.5	2.7	2.6	209.9	157.6	1.031	2	8
447	Female	26 a 40 años	33	0.7	114.206	36.1	Obese	133	83	Hipertension grade I	25.8	29.6	27.7	106.6	pre Diabetes	34.7	33.6	34.15	3.1	4.8	3.95	211.8	168.1	1.025	3	7
448	Female	26 a 40 años	33	0.95	78.9484	35.1	Obese	145	95	Hipertension grade II	26.4	29	27.7	106.5	pre Diabetes	38.8	34.3	36.55	4.4	4.7	4.55	213	178	1.035	3	8
449	Female	26 a 40 años	33	0.8	97.1797	30	Obese	148	94	Hipertension grade II	27.4	28.5	27.95	101.9	pre Diabetes	34.2	36.9	35.55	3.1	4.6	3.85	201.3	186.2	1.029	0	7
450	Female	26 a 40 años	33	0.9	84.2815	36.2	Obese	146	93	Hipertension grade II	28	75.5	51.75	120.8	pre Diabetes	25.7	27.4	26.55	4.1	5.4	4.75	216.2	196.4	1.025	2	8
451	Female	26 a 40 años	33	0.9	84.2815	38.2	Obese	148	91	Hipertension grade II	27.8	29.3	28.55	134.8	Diabetes	26.8	34.7	30.75	3.4	5.1	4.25	221.9	162.5	1.025	1	6
452	Female	26 a 40 años	33	0.95	78.9484	38.9	Obese	148	93	Hipertension grade II	25.9	27	26.45	135.2	Diabetes	29.4	36	32.7	3.4	3.8	3.6	224.7	197	1.031	2	6
453	Female	26 a 40 años	33	0.85	90.3116	37.7	Obese	146	94	Hipertension grade II	26.7	27.9	27.3	134.9	Diabetes	36.2	28	32.1	4.5	2.7	3.6	204.3	195.3	1.029	3	6
454	Female	26 a 40 años	33	0.85	90.3116	33.2	Obese	146	92	Hipertension grade II	26.3	28.9	27.6	129.6	Diabetes	33.4	35.7	34.55	4.8	5.4	5.1	215.4	175.2	1.033	1	5
455	Female	26 a 40 años	33	0.8	97.1797	34	Obese	144	90	Hipertension grade II	25.9	25.2	25.55	129.6	Diabetes	34.6	32.4	33.5	3.5	5	4.25	236	176.8	1.024	2	5
456	Female	26 a 40 años	33	1	74.2013	34.7	Obese	148	91	Hipertension grade II	26.6	27.1	26.85	131.1	Diabetes	36.1	37.2	36.65	3.5	3.1	3.3	236	158.6	1.033	0	5
457	Female	26 a 40 años	33	0.9	84.2815	36.2	Obese	141	90	Hipertension grade II	28.2	28.6	28.4	132.3	Diabetes	25.7	32.4	29.05	4.6	5.2	4.9	205.4	154.7	1.034	3	5
458	Female	26 a 40 años	33	0.95	78.9484	35.6	Obese	140	94	Hipertension grade II	28.2	27.3	27.75	133.6	Diabetes	29.9	32	30.95	4.4	3.5	3.95	201.5	170.9	1.029	3	5
459	Female	26 a 40 años	33	0.9	84.2815	35.5	Obese	148	95	Hipertension grade II	27.9	28.9	28.4	87.8	normal glucose	25.9	28.3	27.1	4.7	4.7	4.7	228.9	176.6	1.027	0	6
460	Female	26 a 40 años	33	0.85	90.3116	35.6	Obese	143	94	Hipertension grade II	28.6	28.2	28.4	90.6	normal glucose	29.7	25.7	27.7	5.1	4.1	4.6	217.9	184.8	1.024	1	5
461	Female	26 a 40 años	33	0.6	120.147	36.6	Obese	116	79	Normotension	26.6	267.6	147.1	74.8	normal glucose	26.2	35.2	30.7	3.7	4.1	3.9	232.1	157	1.023	3	7
462	Female	26 a 40 años	33	0.9	84.2815	32.9	Obese	110	75	Normotension	56.7	192.7	124.7	92.2	normal glucose	27.6	31.5	29.55	3.6	7.9	5.75	204.2	187.2	1.027	2	8
463	Female	26 a 40 años	33	0.9	84.2815	35.3	Obese	117	80	Normotension	25	29.7	27.35	90.9	normal glucose	37.8	39.9	38.85	3.4	3.8	3.6	214.1	176	1.031	0	8
464	Female	26 a 40 años	33	0.7	114.206	37	Obese	116	75	Normotension	27.4	28.7	28.05	112.1	pre Diabetes	39	37.7	38.35	3.9	3.6	3.75	208.7	167.8	1.024	2	8
465	Female	26 a 40 años	33	0.65	117.024	31.2	Obese	119	78	Normotension	28.1	28.2	28.15	121.1	pre Diabetes	33.7	29.5	31.6	4.6	2.5	3.55	238.5	186.7	1.035	0	7
466	Female	26 a 40 años	33	1.05	69.9509	31.7	Obese	120	75	Pre Hipertension	25.4	26.4	25.9	113.7	pre Diabetes	28.2	31.3	29.75	3.6	3.4	3.5	220	179.6	1.033	1	5
467	Female	26 a 40 años	33	0.8	97.1797	36.7	Obese	123	77	Pre Hipertension	25.4	26.5	25.95	122.7	pre Diabetes	33	30.3	31.65	4.8	5.4	5.1	209.3	161.5	1.026	2	6
468	Female	26 a 40 años	33	0.8	97.1797	31.4	Obese	125	78	Pre Hipertension	29	28.4	28.7	113.1	pre Diabetes	31.1	32	31.55	5.1	4.7	4.9	222.3	170	1.032	1	5
469	Female	26 a 40 años	33	1.05	69.9509	34.5	Obese	127	76	Pre Hipertension	26.2	26.5	26.35	102.7	pre Diabetes	30.9	35.6	33.25	4.8	3.2	4	226.6	153.2	1.026	0	6
470	Female	26 a 40 años	33	0.85	90.3116	30.4	Obese	127	80	Pre Hipertension	29.3	25.2	27.25	129.4	Diabetes	36.7	26	31.35	2.5	3.3	2.9	208.2	181.2	1.029	3	5
471	Female	26 a 40 años	33	0.8	97.1797	30.4	Obese	139	87	Hipertension grade I	26.7	29.3	28	135.6	Diabetes	37.2	27.9	32.55	4.1	4.3	4.2	217	153	1.035	1	6
472	Female	26 a 40 años	33	0.7	114.206	39.1	Obese	135	89	Hipertension grade I	27.5	25.8	26.65	133.1	Diabetes	31.5	27.5	29.5	3.8	4.4	4.1	235.7	163.3	1.026	1	5
473	Female	26 a 40 años	33	0.85	90.3116	33.7	Obese	132	83	Hipertension grade I	25.9	26.8	26.35	135.1	Diabetes	25.2	30.1	27.65	3.9	3.5	3.7	224.6	195.1	1.028	0	5
474	Female	26 a 40 años	33	1	74.2013	39	Obese	148	93	Hipertension grade II	27.2	26.1	26.65	129.2	Diabetes	35.6	33.3	34.45	3.6	5.1	4.35	212	185.9	1.029	1	6
475	Male	41 a 65 años	53	1.1	76.2368	32.3	Obese	118	79	Normotension	26.5	27.1	26.8	75.3	normal glucose	28.9	29.1	29	5.7	4.2	4.95	204.7	177.1	1.034	1	6
476	Male	41 a 65 años	53	0.9	97.1693	34.5	Obese	117	80	Normotension	28.5	29.9	29.2	79.5	normal glucose	32.6	36.3	34.45	6.4	6.4	6.4	226.7	156.8	1.034	0	8
477	Male	41 a 65 años	53	0.85	99.4791	37.6	Obese	110	75	Normotension	27.3	28	27.65	94	normal glucose	32.8	32.6	32.7	4.6	6.6	5.6	237.4	168.8	1.035	2	8
478	Male	41 a 65 años	53	1.05	80.6474	30.1	Obese	113	78	Normotension	27.1	25.6	26.35	83.9	normal glucose	30.9	25.1	28	3.6	4.9	4.25	217.7	165.2	1.034	1	8
479	Male	41 a 65 años	53	0.75	104.73	37.1	Obese	112	80	Normotension	29.9	29	29.45	79	normal glucose	36	26	31	6.3	7	6.65	229.4	150.6	1.028	1	7
480	Male	41 a 65 años	53	0.75	104.73	31.7	Obese	123	79	Pre Hipertension	25.5	29	27.25	101.2	pre Diabetes	35.7	32.6	34.15	7	5.7	6.35	219.4	192.6	1.028	0	7
481	Male	41 a 65 años	53	0.95	91.0208	34.8	Obese	123	80	Pre Hipertension	28.8	27.6	28.2	111.5	pre Diabetes	34.9	34.5	34.7	4.2	5.3	4.75	202.2	156.7	1.032	1	5
482	Male	41 a 65 años	53	1.15	72.2478	39.9	Obese	129	77	Pre Hipertension	26.9	28.6	27.75	122	pre Diabetes	28.3	26.8	27.55	4.4	3.6	4	220.1	183.3	1.025	3	6
483	Male	41 a 65 años	53	1.05	80.6474	34.5	Obese	125	76	Pre Hipertension	29.8	26	27.9	118.9	pre Diabetes	33.2	39.4	36.3	5.5	4.2	4.85	222.2	180.2	1.028	2	6
484	Male	41 a 65 años	53	0.85	99.4791	36.4	Obese	127	75	Pre Hipertension	28.9	290.1	159.5	125	Diabetes	34.6	37.2	35.9	5.8	3.3	4.55	214	157.9	1.025	0	6
485	Male	41 a 65 años	53	0.95	91.0208	34	Obese	132	85	Hipertension grade I	25.9	28.3	27.1	128.1	Diabetes	37.4	38.4	37.9	3.6	5.9	4.75	218.8	159.9	1.024	3	5
486	Male	41 a 65 años	53	1.15	72.2478	33.4	Obese	131	80	Hipertension grade I	25.2	27.6	26.4	133	Diabetes	29.6	34.5	32.05	4.3	4	4.15	217	173.9	1.034	2	6
487	Male	41 a 65 años	53	0.9	97.1693	34.5	Obese	131	84	Hipertension grade I	27.5	29.3	28.4	132.3	Diabetes	28.3	27.7	28	4.3	4.1	4.2	229.7	171.6	1.023	2	5
488	Male	41 a 65 años	53	1	85.5477	36.5	Obese	135	86	Hipertension grade I	25.5	25.2	25.35	133.7	Diabetes	26.4	37.8	32.1	6.5	6.6	6.55	220.9	179.1	1.031	3	6
489	Male	41 a 65 años	53	0.75	104.73	31.9	Obese	132	83	Hipertension grade I	26.9	30	28.45	130.2	Diabetes	35	35.3	35.15	6.9	5.5	6.2	215.5	180.1	1.033	3	6
490	Male	41 a 65 años	53	0.9	97.1693	31.2	Obese	141	94	Hipertension grade II	26.3	27	26.65	132.3	Diabetes	26.7	27.9	27.3	3.7	6.6	5.15	200.4	188.1	1.023	3	6
491	Male	41 a 65 años	53	1.1	76.2368	37.8	Obese	140	94	Hipertension grade II	29.5	27.4	28.45	125.5	Diabetes	33.8	26.8	30.3	5.9	6.9	6.4	202.9	175.7	1.024	2	6
492	Male	41 a 65 años	53	1.15	72.2478	39	Obese	142	92	Hipertension grade II	26.4	28.1	27.25	91.8	normal glucose	25.7	26.7	26.2	5.3	4.6	4.95	219.6	159.3	1.027	2	5
493	Male	41 a 65 años	53	0.8	101.989	30.5	Obese	145	91	Hipertension grade II	26.9	26.5	26.7	88.7	normal glucose	28	37.6	32.8	3.6	6.9	5.25	209.1	155.5	1.023	2	6
494	Male	41 a 65 años	53	0.9	97.1693	32.9	Obese	110	76	Normotension	28.2	25.4	26.8	96.7	normal glucose	25.6	27.4	26.5	5.6	5	5.3	205.1	165.9	1.027	3	6
495	Male	41 a 65 años	53	1.1	76.2368	36.2	Obese	116	79	Normotension	25.1	26.4	25.75	84.9	normal glucose	31.3	32.6	31.95	6.7	3.1	4.9	234.4	195.4	1.027	0	8
496	Male	41 a 65 años	53	1	85.5477	40	Obese	113	76	Normotension	28.8	25.6	27.2	88.1	normal glucose	28.2	37.8	33	6.8	4.4	5.6	232.2	191.4	1.031	1	8
497	Male	41 a 65 años	53	1.15	72.2478	38.2	Obese	114	75	Normotension	28.7	29.8	29.25	121.4	pre Diabetes	26.6	37	31.8	3.4	3.5	3.45	239.3	169	1.025	1	7
498	Male	41 a 65 años	53	1	85.5477	35.1	Obese	120	77	Normotension	32.6	267.7	150.15	114.7	pre Diabetes	39.6	30.8	35.2	5.7	6.5	6.1	210.9	174.3	1.029	1	7
499	Male	41 a 65 años	53	0.9	97.1693	35.4	Obese	129	79	Pre Hipertension	34.7	29.5	32.1	130	Diabetes	37.9	27.6	32.75	5	6	5.5	220.5	184.6	1.028	1	8
500	Male	41 a 65 años	53	1.1	76.2368	33.7	Obese	121	79	Pre Hipertension	26.3	25.5	25.9	129.9	Diabetes	32.6	32.6	32.6	3.5	4.4	3.95	215.7	175.9	1.024	1	6
501	Male	41 a 65 años	53	0.85	99.4791	34.1	Obese	120	79	Pre Hipertension	28.4	27.4	27.9	133.8	Diabetes	26	31.3	28.65	5.3	6.3	5.8	233.4	165.4	1.029	3	5
502	Male	41 a 65 años	53	1.05	80.6474	36	Obese	125	75	Pre Hipertension	26.1	27.1	26.6	129.4	Diabetes	36.3	25.4	30.85	3.8	4.3	4.05	222.2	169.9	1.026	0	6
503	Male	41 a 65 años	53	0.9	97.1693	38.6	Obese	120	75	Pre Hipertension	28.6	25.5	27.05	86.7	normal glucose	26	27	26.5	6.3	4.9	5.6	224.9	162.9	1.031	3	5
504	Male	41 a 65 años	53	0.95	91.0208	38.8	Obese	145	95	Hipertension grade II	25.2	29.4	27.3	80.2	normal glucose	27.6	39.8	33.7	3.2	3.6	3.4	236	156.6	1.024	3	5
505	Male	41 a 65 años	53	0.95	91.0208	31.5	Obese	145	92	Hipertension grade II	28.9	28.6	28.75	94.5	normal glucose	38.9	26.7	32.8	5.8	5.3	5.55	237.6	172.3	1.029	0	5
506	Male	41 a 65 años	53	0.8	101.989	39.9	Obese	140	91	Hipertension grade II	27.5	27.2	27.35	84.5	normal glucose	40	35.3	37.65	4.4	4.3	4.35	208.8	190.1	1.034	0	5
507	Male	41 a 65 años	53	0.85	99.4791	35.4	Obese	141	95	Hipertension grade II	27.1	27	27.05	71.5	normal glucose	25.6	28.3	26.95	4	3.5	3.75	229.6	182.8	1.031	1	5
508	Male	41 a 65 años	53	1.1	76.2368	32.8	Obese	141	95	Hipertension grade II	29.7	29.7	29.7	130.1	Diabetes	38.9	26.4	32.65	6.8	4.3	5.55	200.7	186.7	1.031	0	5
509	Male	41 a 65 años	53	0.8	101.989	36.9	Obese	147	92	Hipertension grade II	27.1	29	28.05	127.3	Diabetes	32.8	36.1	34.45	5.7	4.9	5.3	228.9	181.1	1.034	1	5
510	Female	41 a 65 años	53	0.55	107.431	34.1	Obese	113	75	Normotension	27.5	27.8	27.65	77.7	normal glucose	30.5	29.4	29.95	4.5	5	4.75	203.2	178.8	1.031	0	6
511	Female	41 a 65 años	53	0.85	78.4745	36	Obese	114	76	Normotension	28.8	27.7	28.25	94.3	normal glucose	39	37.4	38.2	4.7	4.7	4.7	204.1	154	1.031	0	7
512	Female	41 a 65 años	53	0.9	73.2347	31.5	Obese	110	80	Normotension	27.8	25.6	26.7	91.7	normal glucose	32.4	28.5	30.45	4.9	5	4.95	227.8	165.8	1.032	3	7
513	Female	41 a 65 años	53	0.85	78.4745	33.8	Obese	112	78	Normotension	28.4	29.9	29.15	75.6	normal glucose	35.3	31.1	33.2	4.2	5.1	4.65	219.6	172.3	1.031	3	7
514	Female	41 a 65 años	53	1	64.4757	31.1	Obese	115	75	Normotension	27.1	26.8	26.95	84.7	normal glucose	35.8	39.3	37.55	2.8	4.6	3.7	215	183.8	1.033	1	7
515	Female	41 a 65 años	53	0.55	107.431	34.2	Obese	124	78	Pre Hipertension	28.1	27.3	27.7	85.3	normal glucose	35.1	29.9	32.5	4.2	3.5	3.85	200.7	158.7	1.032	3	7
516	Female	41 a 65 años	53	0.95	68.6007	30.5	Obese	120	80	Pre Hipertension	27.2	28.5	27.85	86	normal glucose	29.6	30.4	30	2.7	5.3	4	209	170.9	1.026	0	6
517	Female	41 a 65 años	53	1	64.4757	33.1	Obese	124	79	Pre Hipertension	26.8	29.5	28.15	117.6	pre Diabetes	29.4	37.9	33.65	4.3	2.6	3.45	207.8	157.1	1.024	3	6
518	Female	41 a 65 años	53	0.9	73.2347	32.7	Obese	129	76	Pre Hipertension	30	28.2	29.1	117.5	pre Diabetes	26.1	30.9	28.5	3.1	2.9	3	206.1	173.7	1.032	2	6
519	Female	41 a 65 años	53	0.7	99.2368	38.6	Obese	122	79	Pre Hipertension	25.7	26.6	26.15	111.9	pre Diabetes	30.1	31.4	30.75	2.8	3.7	3.25	230.1	150.2	1.031	1	6
520	Female	41 a 65 años	53	1	64.4757	32.2	Obese	134	81	Hipertension grade I	25.4	28	26.7	102.1	pre Diabetes	29.7	34.4	32.05	5.4	3.5	4.45	213.5	197.2	1.026	0	6
521	Female	41 a 65 años	53	0.5	110.853	34.3	Obese	132	81	Hipertension grade I	26.6	29.2	27.9	123	pre Diabetes	29.4	28.7	29.05	3.1	4.5	3.8	203.3	156.6	1.035	3	5
522	Female	41 a 65 años	53	0.75	91.295	32.2	Obese	135	88	Hipertension grade I	25.9	27.1	26.5	116.4	pre Diabetes	37.4	32.7	35.05	5.3	2.8	4.05	230.3	179.6	1.024	3	8
523	Female	41 a 65 años	53	0.6	104.399	30	Obese	133	86	Hipertension grade I	28.1	29.8	28.95	130.8	Diabetes	35.8	33.9	34.85	3.6	4.2	3.9	204.7	156	1.024	0	8
524	Female	41 a 65 años	53	0.55	107.431	37.1	Obese	130	82	Hipertension grade I	29.3	29.9	29.6	133	Diabetes	36.1	26.5	31.3	5.5	2.9	4.2	213.2	187.8	1.024	1	8
525	Female	41 a 65 años	53	0.95	68.6007	31.7	Obese	139	85	Hipertension grade I	26.8	30	28.4	73.3	normal glucose	30.9	28.5	29.7	2.8	5.2	4	228	167.8	1.028	1	7
526	Female	41 a 65 años	53	0.8	84.4424	38.6	Obese	140	95	Hipertension grade II	26.5	27.5	27	82.3	normal glucose	28.4	37.4	32.9	3.2	3.8	3.5	239.6	159.5	1.035	1	8
527	Female	41 a 65 años	53	0.7	99.2368	30.4	Obese	144	93	Hipertension grade II	25.4	25.7	25.55	98.5	normal glucose	31.3	33.8	32.55	3.4	4.1	3.75	218.8	184.3	1.029	3	6
528	Female	41 a 65 años	53	1.05	60.7825	33.4	Obese	142	92	Hipertension grade II	25.4	29.6	27.5	92.1	normal glucose	44	44	44	3.8	3.7	3.75	234.2	153.6	1.032	1	6
529	Female	41 a 65 años	53	1	64.4757	38.3	Obese	141	95	Hipertension grade II	25.7	25	25.35	97.5	normal glucose	35.3	30.1	32.7	4.4	4.4	4.4	202.1	183.2	1.024	1	6
530	Female	41 a 65 años	53	1.2	51.7209	30.4	Obese	148	92	Hipertension grade II	206.8	273.2	240	133.9	Diabetes	30.7	25.4	28.05	5.1	8.2	6.65	204.7	166.5	1.029	0	5
531	Female	41 a 65 años	53	1.1	57.4583	30.8	Obese	146	94	Hipertension grade II	44.5	221.3	132.9	128.8	Diabetes	37.8	35.1	36.45	3.2	5.1	4.15	239.9	182.1	1.035	3	6
532	Female	41 a 65 años	53	0.75	91.295	30.9	Obese	142	94	Hipertension grade II	28.5	26.8	27.65	112.4	pre Diabetes	36.1	39.2	37.65	5.2	4.5	4.85	239.7	155.7	1.025	1	7
533	Female	41 a 65 años	53	0.75	91.295	34.5	Obese	117	80	Normotension	26.8	29.6	28.2	123.7	pre Diabetes	38.3	29.7	34	5.1	5.1	5.1	239.6	189.6	1.025	0	8
534	Female	41 a 65 años	53	0.85	78.4745	39.3	Obese	115	80	Normotension	28.3	28.4	28.35	131.8	Diabetes	30.7	27	28.85	4.6	2.8	3.7	238.8	185.2	1.027	0	7
535	Female	41 a 65 años	53	1	64.4757	36.8	Obese	118	76	Normotension	29.7	26.6	28.15	127.2	Diabetes	39.4	37.4	38.4	5.1	4.7	4.9	237.5	180.9	1.029	3	7
536	Female	41 a 65 años	53	0.7	99.2368	37.2	Obese	119	76	Normotension	28.3	28.6	28.45	130	Diabetes	37.3	35.5	36.4	3.6	4.2	3.9	222	175.2	1.032	2	7
537	Female	41 a 65 años	53	0.75	91.295	35.1	Obese	114	78	Normotension	25.3	29.4	27.35	92.1	normal glucose	38.2	25.8	32	3.5	4.8	4.15	216.8	153.3	1.032	1	6
538	Female	41 a 65 años	53	0.9	73.2347	35	Obese	139	89	Hipertension grade I	28.8		28.8	85.9	normal glucose	39.1	37.7	38.4	2.9	3.4	3.15	238.2	182.6	1.028	0	6
539	Female	41 a 65 años	53	0.85	78.4745	33.2	Obese	132	88	Hipertension grade I	26.3	26.1	26.2	91.1	normal glucose	26.9	33	29.95	5.3	5.2	5.25	213.1	190.1	1.031	2	6
540	Female	41 a 65 años	53	0.8	84.4424	30.8	Obese	136	81	Hipertension grade I	29.9	28	28.95	70.2	normal glucose	35.7	30.7	33.2	4.8	4.6	4.7	201.9	154.7	1.032	0	6
541	Female	41 a 65 años	53	1	64.4757	37.8	Obese	141	91	Hipertension grade II	27.6	26.5	27.05	98.8	normal glucose	32.9	32.4	32.65	3.6	3.8	3.7	219	163.2	1.027	0	5
542	Female	41 a 65 años	53	1	64.4757	32.7	Obese	144	96	Hipertension grade II	28.5	29.4	28.95	127.5	Diabetes	38.7	26.5	32.6	4.6	3.2	3.9	230.1	150.3	1.032	3	6
543	Female	41 a 65 años	53	1.05	60.7825	31.1	Obese	144	91	Hipertension grade II	26.2	26	26.1	126.5	Diabetes	32.1	32.4	32.25	5	3.4	4.2	235.3	194.5	1.025	1	5
544	Male	66 a 80 años	73	0.85	86.4404	37.2	Obese	118	77	Normotension	26.8	28.9	27.85	78.7	normal glucose	25.7	29.3	27.5	3.6	3.8	3.7	234.2	186.4	1.026	2	5
545	Male	66 a 80 años	73	1.15	62.7783	30.3	Obese	118	75	Normotension	25.8	26.1	25.95	89	normal glucose	29.5	28.2	28.85	6.6	4.8	5.7	238.1	159.5	1.029	3	5
546	Male	66 a 80 años	73	1.05	70.077	34.3	Obese	111	80	Normotension	25.8	25.4	25.6	94.4	normal glucose	36.9	30.5	33.7	4.5	3.3	3.9	201.9	187.2	1.029	2	8
547	Male	66 a 80 años	73	0.95	79.0907	37.1	Obese	111	76	Normotension	26.1	28.1	27.1	90.9	normal glucose	26.7	35.5	31.1	5.9	3.9	4.9	231.5	197.3	1.032	1	8
548	Male	66 a 80 años	73	0.8	88.6213	36.5	Obese	112	77	Normotension	29.3	27.4	28.35	81.3	normal glucose	34.6	39.1	36.85	4.7	5.3	5	229.4	151.3	1.035	2	7
549	Male	66 a 80 años	73	0.65	96.5163	38.2	Obese	122	79	Pre Hipertension	27.2	28.2	27.7	105.9	pre Diabetes	37.9	27.3	32.6	4.4	5.5	4.95	238.9	189.8	1.026	2	7
550	Male	66 a 80 años	73	0.95	79.0907	35.1	Obese	127	78	Pre Hipertension	29.7	28.9	29.3	102.2	pre Diabetes	25	35.1	30.05	4.3	4	4.15	221.7	151.9	1.024	0	8
551	Male	66 a 80 años	73	1.15	62.7783	39.2	Obese	121	77	Pre Hipertension	27.4	28.9	28.15	122	pre Diabetes	37.7	29	33.35	3.1	7.1	5.1	207.4	189.4	1.025	0	6
552	Male	66 a 80 años	73	1.05	70.077	37.6	Obese	123	80	Pre Hipertension	27.5	28.5	28	135.4	Diabetes	31.6	25.7	28.65	6.6	4.5	5.55	226	155.6	1.024	2	6
553	Male	66 a 80 años	73	0.9	84.4334	37.7	Obese	124	77	Pre Hipertension	259.3	284.9	272.1	131.1	Diabetes	46	46	46	8.1	5.4	6.75	228.2	151.7	1.027	3	6
554	Male	66 a 80 años	73	0.9	84.4334	32.3	Obese	133	89	Hipertension grade I	28.4	27	27.7	130	Diabetes	30.8	28.7	29.75	4.2	3.9	4.05	204.2	155	1.034	1	6
555	Male	66 a 80 años	73	1.05	70.077	31.8	Obese	137	81	Hipertension grade I	28	28.7	28.35	125.7	Diabetes	34	38.7	36.35	6.7	4	5.35	237.1	166.4	1.031	3	5
556	Male	66 a 80 años	73	1	74.335	35.4	Obese	135	87	Hipertension grade I	28.3	26.2	27.25	83.7	normal glucose	30.2	36.3	33.25	5.9	6.6	6.25	210.3	186.9	1.026	2	5
557	Male	66 a 80 años	73	0.95	79.0907	33.9	Obese	132	83	Hipertension grade I	26.7	25.6	26.15	87.6	normal glucose	27.7	33.9	30.8	4.3	3.2	3.75	218.2	183.7	1.026	3	5
558	Male	66 a 80 años	73	0.95	79.0907	39.1	Obese	135	82	Hipertension grade I	25.5	26.4	25.95	88.2	normal glucose	39.9	27.2	33.55	3.6	5.3	4.45	232.5	193.7	1.023	1	6
559	Male	66 a 80 años	73	0.6	99.7442	33.1	Obese	130	80	Hipertension grade I	25.6	27.6	26.6	83.6	normal glucose	27.2	30.8	29	6.7	4.3	5.5	208.5	189.9	1.031	3	6
560	Male	66 a 80 años	73	0.95	79.0907	34.2	Obese	141	93	Hipertension grade II	27	27.2	27.1	77.7	normal glucose	30.3	33	31.65	6.6	3.8	5.2	201.9	152.9	1.027	2	6
561	Male	66 a 80 años	73	0.75	91.0034	31.1	Obese	121	77	Pre Hipertension	26.5	26.4	26.45	104.9	pre Diabetes	27.8	39.5	33.65	5.8	6.2	6	230.6	196.9	1.024	0	6
562	Male	66 a 80 años	73	0.8	88.6213	33.4	Obese	123	75	Pre Hipertension	25.1	161.5	93.3	102.2	pre Diabetes	38.6	33	35.8	5.9	5.3	5.6	228.2	177.5	1.029	1	6
563	Male	66 a 80 años	73	0.95	79.0907	30.5	Obese	128	76	Pre Hipertension	29.2	27.8	28.5	117.3	pre Diabetes	27.8	30.2	29	3.8	6.7	5.25	237.3	163.7	1.029	2	8
564	Male	66 a 80 años	73	0.95	79.0907	34.3	Obese	121	78	Pre Hipertension	28.3	26.5	27.4	114.7	pre Diabetes	36.9	36.2	36.55	3.9	5.9	4.9	209.3	151.2	1.026	1	7
565	Male	66 a 80 años	73	0.95	79.0907	38.1	Obese	142	90	Hipertension grade II	27.9	28.5	28.2	106.5	pre Diabetes	31.4	29.5	30.45	5.8	6.3	6.05	236	155.1	1.027	1	8
566	Male	66 a 80 años	73	1	74.335	31.5	Obese	147	91	Hipertension grade II	28.9		28.9	103.8	pre Diabetes	43	43	43	3.2	4.8	4	209.3	154.9	1.031	1	7
567	Male	66 a 80 años	73	0.85	86.4404	30	Obese	110	76	Normotension	27.8	26.3	27.05	117.6	pre Diabetes	28	40	34	5.8	5.1	5.45	219.8	195.1	1.028	0	7
568	Male	66 a 80 años	73	1.35	51.7154	33	Obese	114	79	Normotension	26.7	29	27.85	122.8	pre Diabetes	30	30.6	30.3	6	7	6.5	234	161.1	1.026	0	5
569	Male	66 a 80 años	73	1.25	56.7583	35.5	Obese	114	79	Normotension	27.1	26.3	26.7	125.8	Diabetes	36.5	37	36.75	4.8	4.6	4.7	215	188.4	1.031	0	6
570	Male	66 a 80 años	73	0.9	84.4334	31.5	Obese	113	77	Normotension	25.6		25.6	135.6	Diabetes	35.7	28.1	31.9	5.4	6.1	5.75	236.9	196.2	1.032	3	5
571	Male	66 a 80 años	73	1.2	59.6298	36.1	Obese	119	77	Normotension	25.3	27	26.15	129.6	Diabetes	27.4	28.5	27.95	6.1	3.8	4.95	201.3	163.1	1.024	3	6
572	Male	66 a 80 años	73	1.2	59.6298	37.8	Obese	144	90	Hipertension grade II	27.1	29.8	28.45	129.2	Diabetes	36.3	38	37.15	3.6	6.8	5.2	211.2	154.4	1.034	1	6
573	Male	66 a 80 años	73	1	74.335	34.3	Obese	143	93	Hipertension grade II	29.5	25.2	27.35	135.2	Diabetes	34.1	38.8	36.45	5.2	6.5	5.85	231.8	171.2	1.027	0	6
574	Male	66 a 80 años	73	0.85	86.4404	39.8	Obese	145	91	Hipertension grade II	30	27.8	28.9	133.3	Diabetes	37.8	40	38.9	7.1	6.6	6.85	201.8	158.7	1.035	0	5
575	Male	66 a 80 años	73	0.9	84.4334	39.5	Obese	146	94	Hipertension grade II	29.9	29.7	29.8	125.4	Diabetes	27.2	26.6	26.9	4	3.8	3.9	209.4	170.9	1.031	2	5
576	Female	66 a 80 años	73	0.95	59.6092	37.3	Obese	141	94	Hipertension grade II	29.1	26.5	27.8	96.2	normal glucose	32.7	35.5	34.1	4	5.2	4.6	225.2	178.1	1.028	2	8
577	Female	66 a 80 años	73	0.9	63.6359	36.2	Obese	144	93	Hipertension grade II	26.9	26	26.45	87.6	normal glucose	33.5	34.9	34.2	2.7	4.1	3.4	226.5	170.5	1.032	1	7
578	Female	66 a 80 años	73	1.1	49.9272	39.2	Obese	118	80	Normotension	29.7	29.4	29.55	88.4	normal glucose	28	34.3	31.15	3.5	2.5	3	214.1	159.5	1.026	0	7
579	Female	66 a 80 años	73	0.95	59.6092	40	Obese	110	78	Normotension	26.2	26.4	26.3	83	normal glucose	38.1	25.8	31.95	5.3	5	5.15	214.3	181.5	1.035	2	8
580	Female	66 a 80 años	73	0.9	63.6359	35.3	Obese	120	76	Normotension	27.2	25.6	26.4	84.3	normal glucose	35.9	26.6	31.25	3.7	5.2	4.45	222.9	152.4	1.033	3	7
581	Female	66 a 80 años	73	0.85	68.1889	31.1	Obese	112	80	Normotension	29.6	27.6	28.6	102.9	pre Diabetes	25.3	27.4	26.35	2.9	4.2	3.55	203.6	182.8	1.034	0	6
582	Female	66 a 80 años	73	0.8	73.3745	30.3	Obese	112	80	Normotension	27.5	29.1	28.3	100.2	pre Diabetes	36.3	27.5	31.9	4.8	4.2	4.5	206.9	155.8	1.029	2	6
583	Female	66 a 80 años	73	1.1	49.9272	38.6	Obese	125	80	Pre Hipertension	28.1	27.9	28	106.1	pre Diabetes	25.6	25.8	25.7	5.2	2.9	4.05	212.6	195.8	1.027	2	6
584	Female	66 a 80 años	73	1.05	52.8157	33.2	Obese	120	80	Pre Hipertension	25.3	30	27.65	123.9	pre Diabetes	36.6	27.7	32.15	4.2	4.7	4.45	210.9	177.9	1.034	1	5
585	Female	66 a 80 años	73	0.85	68.1889	34.1	Obese	128	75	Pre Hipertension	25.5	26.9	26.2	102.9	pre Diabetes	32.1	31.3	31.7	3.1	3.7	3.4	215.8	178.4	1.028	0	6
586	Female	66 a 80 años	73	0.7	86.2299	34.1	Obese	124	79	Pre Hipertension	25.6	26.5	26.05	113	pre Diabetes	36.6	39	37.8	3.1	4.5	3.8	239.4	180.8	1.025	0	6
587	Female	66 a 80 años	73	1	56.0249	35.7	Obese	124	75	Pre Hipertension	26.7	28.7	27.7	87.4	normal glucose	35.5	39.6	37.55	5.5	4	4.75	216.2	172	1.028	1	8
588	Female	66 a 80 años	73	1.1	49.9272	32.2	Obese	125	78	Pre Hipertension	30.9	273.9	152.4	77.3	normal glucose	25.5	35.8	30.65	5.2	2.8	4	215.8	175.3	1.033	0	7
589	Female	66 a 80 años	73	0.75	79.329	35.3	Obese	128	80	Pre Hipertension	33.4	130.7	82.05	74.3	normal glucose	29.4	36.5	32.95	5.1	5.5	5.3	232.1	194.5	1.026	3	8
590	Female	66 a 80 años	73	0.75	79.329	36	Obese	138	89	Hipertension grade I	26.1	28.2	27.15	84.1	normal glucose	27.3	28.9	28.1	3	2.8	2.9	204.3	186.1	1.034	0	8
591	Female	66 a 80 años	73	1	56.0249	31.8	Obese	136	83	Hipertension grade I	25.5	28.4	26.95	96.8	normal glucose	36.2	36.3	36.25	3.6	2.6	3.1	222.3	187	1.035	0	8
592	Female	66 a 80 años	73	0.8	73.3745	33.8	Obese	131	83	Hipertension grade I	25.2	26.4	25.8	121.3	pre Diabetes	33.8	27.1	30.45	3.6	4.6	4.1	234	160.4	1.024	1	6
593	Female	66 a 80 años	73	1.25	42.7777	38.1	Obese	131	87	Hipertension grade I	25.6	25.8	25.7	113.3	pre Diabetes	37.5	30	33.75	3.4	3.4	3.4	237.9	177.5	1.032	0	6
594	Female	66 a 80 años	73	0.95	59.6092	31.7	Obese	130	88	Hipertension grade I	28.1	26.6	27.35	94.3	normal glucose	30.1	31.4	30.75	4.5	3.9	4.2	237.5	176.2	1.033	0	6
595	Female	66 a 80 años	73	0.85	68.1889	38.3	Obese	138	87	Hipertension grade I	27.5	28.4	27.95	87	normal glucose	29.3	39	34.15	5.1	2.8	3.95	212.2	159.1	1.023	0	5
596	Female	66 a 80 años	73	0.5	96.3238	34.2	Obese	144	91	Hipertension grade II	30	26.4	28.2	70.2	normal glucose	35.9	34.4	35.15	3.7	4.8	4.25	217.2	154.4	1.029	0	6
597	Female	66 a 80 años	73	0.95	59.6092	36.9	Obese	144	90	Hipertension grade II	25.3	29.7	27.5	76.1	normal glucose	35.3	27.9	31.6	4.2	4.6	4.4	219	161.1	1.031	0	8
598	Female	66 a 80 años	73	0.75	79.329	33.7	Obese	142	92	Hipertension grade II	25.6	26	25.8	76.6	normal glucose	36.2	36.2	36.2	5.1	2.9	4	221.7	171.6	1.024	1	8
599	Female	66 a 80 años	73	1.05	52.8157	34.1	Obese	146	91	Hipertension grade II	29.2	25.5	27.35	110.3	pre Diabetes	25.2	28.9	27.05	4.9	4	4.45	232.9	194.4	1.023	0	7
600	Female	66 a 80 años	73	0.9	63.6359	33.9	Obese	147	96	Hipertension grade II	25.6	26.7	26.15	116.2	pre Diabetes	31.2	36.8	34	3.2	4.7	3.95	229.4	163.8	1.027	0	8
601	Female	66 a 80 años	73	1	56.0249	32.1	Obese	143	96	Hipertension grade II	27.4	28.7	28.05	105.1	pre Diabetes	25.1	25.9	25.5	3.4	3.1	3.25	235.9	185.5	1.033	2	8
602	Female	66 a 80 años	73	0.9	63.6359	35.8	Obese	143	93	Hipertension grade II	27.4	25.8	26.6	127.9	Diabetes	27	35.1	31.05	2.7	4.2	3.45	203.9	187	1.025	3	6
603	Female	66 a 80 años	73	0.65	88.3581	32.2	Obese	143	90	Hipertension grade II	27.6	26.2	26.9	126.3	Diabetes	38.4	30.1	34.25	2.7	3.2	2.95	230	159.8	1.028	2	6
604	Male	> 80 años	85	0.8	81.4571	30.1	Obese	114	78	Normotension	27.3	27.6	27.45	96.7	normal glucose	28.8	28.7	28.75	5.9	4.8	5.35	204.1	184.7	1.023	3	6
605	Male	> 80 años	85	0.8	81.4571	38.7	Obese	118	75	Normotension	29	27.4	28.2	77.3	normal glucose	31.6	25.9	28.75	4.8	3.6	4.2	221.2	178	1.026	1	8
606	Male	> 80 años	85	1.25	52.1699	33.6	Obese	120	75	Normotension	287.5	187.9	237.7	93.8	normal glucose	30.6	32.5	31.55	8.1	6	7.05	238.3	180.9	1.031	1	8
607	Male	> 80 años	85	1.15	57.7033	36.5	Obese	113	78	Normotension	28.8	25.9	27.35	93.2	normal glucose	26.2	35.3	30.75	5.9	4.6	5.25	225.8	176.8	1.029	3	7
608	Male	> 80 años	85	0.7	86.0525	33.5	Obese	119	80	Normotension	28.1	26.6	27.35	78.4	normal glucose	37.8	34.6	36.2	6.2	6.7	6.45	225.6	177.6	1.026	2	8
609	Male	> 80 años	85	0.95	72.697	39.1	Obese	127	80	Pre Hipertension	28.8	29.8	29.3	88.2	normal glucose	31.3	28.7	30	3.6	5.5	4.55	210.5	173.8	1.029	0	8
610	Male	> 80 años	85	1.1	60.8893	36	Obese	128	78	Pre Hipertension	25.5	28.4	26.95	79.2	normal glucose	38.7	34.2	36.45	5.3	3.9	4.6	203.4	175	1.031	1	5
611	Male	> 80 años	85	0.8	81.4571	31.8	Obese	128	78	Pre Hipertension	28.2	25.4	26.8	116.3	pre Diabetes	39	29.2	34.1	6.5	6.3	6.4	236.2	196.4	1.023	3	5
612	Male	> 80 años	85	0.85	79.4525	34.4	Obese	120	80	Pre Hipertension	25.5	30	27.75	115.8	pre Diabetes	32.8	25.6	29.2	4.4	3.5	3.95	217.4	176.3	1.027	0	6
613	Male	> 80 años	85	0.75	83.6467	37.2	Obese	127	76	Pre Hipertension	25.5	28.4	26.95	119.5	pre Diabetes	32.1	28.8	30.45	4.4	4.5	4.45	222.4	151.5	1.032	3	6
614	Male	> 80 años	85	0.8	81.4571	32	Obese	134	85	Hipertension grade I	25.6	27.5	26.55	112.6	pre Diabetes	35.6	31	33.3	6.1	5.2	5.65	202.6	171.7	1.031	1	5
615	Male	> 80 años	85	0.95	72.697	33.5	Obese	133	85	Hipertension grade I	28	27.2	27.6	131.3	Diabetes	28.7	26.2	27.45	3.2	4.2	3.7	223.2	150.7	1.026	3	6
616	Male	> 80 años	85	0.8	81.4571	36.3	Obese	131	81	Hipertension grade I	26.9	27.4	27.15	126.1	Diabetes	30.1	38.9	34.5	5	4.2	4.6	212.5	194.3	1.024	1	5
617	Male	> 80 años	85	0.95	72.697	35.1	Obese	139	81	Hipertension grade I	29.4	27.9	28.65	135.6	Diabetes	35.3	32.1	33.7	5.7	4.2	4.95	231.1	169.2	1.024	3	5
618	Male	> 80 años	85	1.1	60.8893	36.8	Obese	139	88	Hipertension grade I	25.3	27	26.15	87.2	normal glucose	25.7	31.7	28.7	6.9	4.2	5.55	207.1	154.8	1.026	3	5
619	Male	> 80 años	85	1.1	60.8893	33.4	Obese	131	89	Hipertension grade I	27.7	156.9	92.3	78.3	normal glucose	33.8	32.3	33.05	6	3.1	4.55	236.3	176.1	1.031	3	5
620	Male	> 80 años	85	0.85	79.4525	39.1	Obese	111	79	Normotension	26	26.9	26.45	98.3	normal glucose	36	27.8	31.9	4.9	3.6	4.25	207.4	176.6	1.027	0	6
621	Male	> 80 años	85	1.1	60.8893	33.5	Obese	120	76	Normotension	25.1	29.9	27.5	91.7	normal glucose	27.5	35.2	31.35	5.3	6.9	6.1	230.4	153.2	1.035	3	5
622	Male	> 80 años	85	1.6	38.7082	39.8	Obese	113	77	Normotension	29.5	27.4	28.45	91.1	normal glucose	36.7	28	32.35	3.4	5	4.2	211	176.2	1.028	3	6
623	Male	> 80 años	85	0.8	81.4571	36	Obese	114	76	Normotension	29.1	28.3	28.7	89.1	normal glucose	29.6	39.7	34.65	6.8	3.8	5.3	218.8	160.5	1.034	1	6
624	Male	> 80 años	85	1	68.3258	37.4	Obese	146	90	Hipertension grade II	29.2	27.4	28.3	71.8	normal glucose	28.2	28.9	28.55	5	5.1	5.05	232.8	182.4	1.028	3	5
625	Male	> 80 años	85	1.05	64.412	30.9	Obese	146	92	Hipertension grade II	26.8	25.6	26.2	72.2	normal glucose	45	45	45	6	6.3	6.15	210.3	192.3	1.027	2	6
626	Male	> 80 años	85	1	68.3258	32.7	Obese	146	94	Hipertension grade II	26.6	26.7	26.65	86.5	normal glucose	37.8	33.8	35.8	6.6	6.3	6.45	224.7	175.2	1.024	2	6
627	Male	> 80 años	85	1.2	54.8093	32.9	Obese	146	91	Hipertension grade II	25.8	28.8	27.3	95.6	normal glucose	37.7	27.2	32.45	5.4	6.5	5.95	208.2	171.4	1.024	2	6
628	Male	> 80 años	85	0.9	77.6078	36.7	Obese	147	95	Hipertension grade II	27.5	29.3	28.4	128.6	Diabetes	30	26.9	28.45	4	6.7	5.35	224	162.5	1.025	1	6
629	Female	> 80 años	85	0.75	72.916	33.1	Obese	111	80	Normotension	28.2	27.4	27.8	75.5	normal glucose	25.9	31.7	28.8	4.3	2.9	3.6	224.6	159.1	1.026	1	7
630	Female	> 80 años	85	0.7	79.259	35.4	Obese	115	77	Normotension	29.2	29.6	29.4	97.9	normal glucose	25.2	29.1	27.15	4.7	2.7	3.7	215.4	170.7	1.034	2	7
631	Female	> 80 años	85	0.8	67.4429	30.5	Obese	120	80	Normotension	25.2	27.4	26.3	76	normal glucose	26.8	28.4	27.6	4.5	5.4	4.95	236.5	158	1.034	0	7
632	Female	> 80 años	85	1.1	45.8911	35.2	Obese	115	77	Normotension	25.1	27.7	26.4	89	normal glucose	40	38.5	39.25	4.1	3.6	3.85	204.3	161.2	1.032	1	7
633	Female	> 80 años	85	1.2	41.3087	35.4	Obese	117	76	Normotension	27.4	27.2	27.3	78	normal glucose	37.5	29.4	33.45	4.3	4.2	4.25	221.5	162	1.032	0	8
634	Female	> 80 años	85	1	51.4958	32.9	Obese	126	75	Pre Hipertension	28.2	28.7	28.45	117.2	pre Diabetes	26.4	30.9	28.65	3.5	5.4	4.45	202.7	187.7	1.034	1	5
635	Female	> 80 años	85	1.1	45.8911	32.4	Obese	125	80	Pre Hipertension	255.5	309.4	282.45	124.6	pre Diabetes	25.9	38.2	32.05	4.9	7.8	6.35	231.9	157.3	1.033	2	6
636	Female	> 80 años	85	1.1	45.8911	39.5	Obese	122	80	Pre Hipertension	214.4	310.4	262.4	105.4	pre Diabetes	28.9	28.2	28.55	4.8	3.1	3.95	225.8	183.5	1.033	2	6
637	Female	> 80 años	85	0.7	79.259	37.9	Obese	127	77	Pre Hipertension	28.6	26.1	27.35	122.6	pre Diabetes	29.7	35.6	32.65	4.9	5.1	5	232.7	153.4	1.029	3	6
638	Female	> 80 años	85	0.6	83.3823	34.9	Obese	120	75	Pre Hipertension	29.7	28.5	29.1	94	normal glucose	42	42	42	4.7	3	3.85	238	174.9	1.024	1	5
639	Female	> 80 años	85	0.7	79.259	37.8	Obese	121	79	Pre Hipertension	29.3	26	27.65	79.9	normal glucose	32.2	33.2	32.7	3.8	4.2	4	217.1	152.8	1.026	1	7
640	Female	> 80 años	85	0.8	67.4429	34.4	Obese	122	77	Pre Hipertension	29.3	26.7	28	75.2	normal glucose	31.8	33.9	32.85	5.1	3.9	4.5	212.5	164.8	1.033	3	7
641	Female	> 80 años	85	0.9	58.4915	38	Obese	127	76	Pre Hipertension	29.5	29.2	29.35	83.9	normal glucose	31.3	28.7	30	4.3	4.1	4.2	230.9	187.3	1.034	1	7
642	Female	> 80 años	85	1.05	48.5461	34.5	Obese	127	77	Pre Hipertension	26.6	28.8	27.7	90.2	normal glucose	38.6	29.6	34.1	3.5	4.5	4	208.3	184.8	1.035	1	8
643	Female	> 80 años	85	0.85	62.6765	35.6	Obese	123	78	Pre Hipertension	27.1	25.9	26.5	81.9	normal glucose	38.3	38.9	38.6	5.1	4.5	4.8	215.5	189.5	1.028	3	8
644	Female	> 80 años	85	0.95	54.7904	31.2	Obese	131	80	Hipertension grade I	27.7	29.3	28.5	83	normal glucose	33.3	38.2	35.75	4.7	5.5	5.1	225	184.4	1.025	2	6
645	Female	> 80 años	85	0.8	67.4429	33.6	Obese	130	89	Hipertension grade I	29.5	25.1	27.3	92.2	normal glucose	28.1	25.8	26.95	3.1	3.7	3.4	230.3	155.3	1.028	2	5
646	Female	> 80 años	85	0.95	54.7904	35.6	Obese	130	85	Hipertension grade I	25	25.5	25.25	86.8	normal glucose	25.4	33.4	29.4	3.8	3	3.4	204.8	191.9	1.026	2	8
647	Female	> 80 años	85	0.85	62.6765	34.9	Obese	141	92	Hipertension grade II	29.2	28.8	29	83.4	normal glucose	38.9	39.2	39.05	3.8	5	4.4	200.1	173.5	1.027	2	7
648	Female	> 80 años	85	1.05	48.5461	31.4	Obese	120	75	Normotension	29.8	25.6	27.7	74	normal glucose	32.4	34	33.2	5.1	5.5	5.3	236.8	176.6	1.032	0	7
649	Female	> 80 años	85	0.95	54.7904	35.5	Obese	113	76	Normotension	25.2	27.7	26.45	70.8	normal glucose	37.2	34.4	35.8	3.8	4.7	4.25	223.7	157.6	1.031	1	8
650	Female	> 80 años	85	0.9	58.4915	30.8	Obese	148	93	Hipertension grade II	27.7	72	49.85	76.3	normal glucose	39.2	31.8	35.5	5.5	2.6	4.05	205.1	186.5	1.026	3	7
651	Female	> 80 años	85	0.75	72.916	31.7	Obese	144	90	Hipertension grade II	27.4	29.4	28.4	86.3	normal glucose	31	30.2	30.6	3.9	3.9	3.9	237.3	183.3	1.024	0	5
652	Female	> 80 años	85	0.75	72.916	33.8	Obese	144	90	Hipertension grade II	25.9	26.8	26.35	98.6	normal glucose	29.3	25.7	27.5	2.7	4.4	3.55	239.6	151.2	1.024	2	6
653	Female	> 80 años	85	1	51.4958	34.5	Obese	147	95	Hipertension grade II	25.9	29.5	27.7	121.3	pre Diabetes	38.2	26.9	32.55	4.4	4.1	4.25	232.6	172.4	1.026	1	6
654	Female	> 80 años	85	1	51.4958	39	Obese	134	85	Hipertension grade I	27.8	26.1	26.95	101.9	pre Diabetes	33.2	31.4	32.3	2.8	3.5	3.15	233.5	180.7	1.031	0	6
655	Female	> 80 años	85	0.8	67.4429	34.6	Obese	138	83	Hipertension grade I	26.2	26.9	26.55	108.2	pre Diabetes	26.7	28.7	27.7	4	4.2	4.1	204.3	167.2	1.027	3	5
656	Female	> 80 años	85	0.6	83.3823	39.1	Obese	135	83	Hipertension grade I	28.9	231.8	130.35	108.1	pre Diabetes	39.9	34.7	37.3	5.4	4.2	4.8	230.5	173.8	1.035	2	6
	Media		53.0122	0.910823	85.1222	30.879	#DIV/0!	128.838	82.8079	#DIV/0!	29.3573	36.8318	33.0532	102.803	#NULL!	32.8177	32.3724	32.595	4.59909	4.55061	4.57485	219.736	172.663	1.02872	1.88262	6.25305
	SD
